1 The *Paracaedibacter*-like endosymbiont of  
2 *Bodo saltans* (Kinetoplastida) uses multiple  
3 putative toxin-antitoxin systems to maintain its  
4 host association

5

6 Samriti Midha<sup>1\*</sup>, Daniel J. Rigden<sup>2</sup>, Stefanos Siozios<sup>1</sup>, Gregory D. D. Hurst<sup>1</sup>, Andrew P.

7 Jackson<sup>1</sup>

8

9 <sup>1</sup> Institute of Infection, Veterinary and Ecological Sciences, University of Liverpool, Ic2

10 Liverpool Science Park, 146 Brownlow Hill, Liverpool, L3 5RF. United Kingdom.

11 <sup>2</sup> Institute of Systems, Molecular and Integrative Biology, University of Liverpool, Crown St.,

12 Liverpool, L69 7ZB. United Kingdom.

13

14 Address for correspondence: [S.midha@liv.ac.uk](mailto:S.midha@liv.ac.uk)

15

16

17 **Running Title:** Host association of *Bodo* endosymbiont

18

19 **Keywords:** kinetoplastida, Holosporales, endosymbiosis, toxin, antitoxin, genome

20

21

## 22 **Abstract**

23

24 Bacterial endosymbiosis has been instrumental in eukaryotic evolution, and includes both  
25 mutualistic, dependent and parasitic associations. Here we characterize an intracellular  
26 bacterium inhabiting the flagellated protist *Bodo saltans* (Kinetoplastida). We present a  
27 complete bacterial genome comprising a 1.39 Mb circular chromosome with 40.6% GC  
28 content. Fluorescent in situ hybridisation confirms that the endosymbiont is located adjacent  
29 to the nuclear membrane, and a detailed model of its intracellular niche is generated using  
30 serial block-face scanning electron microscopy. Phylogenomic analysis shows that the  
31 endosymbiont belongs to the Holosporales, most closely related to other  $\alpha$ -proteobacterial  
32 endosymbionts of ciliates and amoebae. Comparative genomics indicates that it has a limited  
33 metabolism and is nutritionally host-dependent. However, the endosymbiont genome does  
34 encode diverse symbiont-specific secretory proteins, including a type VI secretion system and  
35 three separate toxin-antitoxin systems. We show that these systems are actively transcribed  
36 and hypothesize they represent a mechanism by which *B. saltans* becomes addicted to its  
37 endosymbiont. Consistent with this idea, attempts to cure *Bodo* of endosymbionts led to rapid  
38 and uniform cell death. This study adds kinetoplastid flagellates to ciliates and amoebae as  
39 hosts of *Paracaedibacter*-like bacteria, suggesting that these antagonistic endosymbioses  
40 became established very early in Eukaryotic evolution.

## 41 **Introduction**

42

43 Eukaryotes commonly live in intimate associations with microbes (1). For microeukaryotes,  
44 intracellular microbes live as endosymbionts passing to progeny cells following fission (2),  
45 whereas endosymbionts of multicellular species live within host tissues and pass to progeny  
46 during reproduction, commonly inside eggs (3). Heritable host-microbe interactions have  
47 arisen multiple times and involve diverse eubacteria and life strategies.

48

49 The impact of endosymbioses on host and microbe vary widely. In some cases, the host  
50 captures a microbe for its own benefit. For instance, *Paramecium* captures *Chlorella* algae  
51 from the environment, utilizes them to facilitate a mixotrophic rather than heterotrophic  
52 lifestyle, but controls symbiont numbers such that *Chlorella* replication is higher when free-  
53 living than in the symbiotic state (4). In other cases, the microbe can be parasitic. This can  
54 occur when the symbiont is biparentally inherited, or uniparentally inherited, when it distorts  
55 reproduction towards the transmitting sex, for example with *Wolbachia* (5). Finally, and  
56 perhaps most commonly, symbiont and host mutually benefit from the interaction. For  
57 instance, symbionts such as *Buchnera* and *Euplotes* provide protective and nutritional  
58 benefits to their host that promote host survival and reproduction, and in doing so increase  
59 their fitness (6).

60

61 In many cases, host survival and reproduction depend on functions provided by the symbiont.  
62 For instance, loss of the anabolic capacity of *Buchnera* leaves their aphid host with  
63 insufficient essential amino acids that causes host sterility (6, 7). Host dependency may be  
64 due also to coadaptation of cellular and developmental processes (8). The defensive  
65 *Burkholderia* symbiont of the fungus *Rhizopus* is required for completion of the host's sexual

66 phase (9), a system mirroring the requirement of *Asobara tabida* wasps for one of their  
67 *Wolbachia* symbionts to complete oogenesis (10). In these cases, coadaptation over deep  
68 evolutionary time to the presence of the symbiont means that the host fails when the  
69 symbiont is removed, irrespective of any benefit the symbiont might confer.

70

71 There is another potential route to dependency that arises through selection on the symbiont  
72 to addict the host to its presence. Addiction mechanisms using toxin-antitoxin systems are a  
73 common retention mechanism for plasmids in bacteria (11) and are also observed in a variety  
74 of selfish genetic elements, such as the peel-zeel system of *C. elegans* (12). These systems  
75 typically function through delivery of a long-lived toxin molecule alongside an antitoxin with  
76 a shorter half-life. Should the element carrying the system not be inherited then the toxin  
77 becomes active and kills the non-bearer individual. Bacterial endosymbionts are currently not  
78 known to addict hosts through toxin-antitoxin systems, although they are known to exploit  
79 similar ‘rescue’ based systems in creating the phenotype of cytoplasmic incompatibility (12,  
80 13).

81

82 In this study, we investigated the symbiosis between the flagellate *Bodo saltans*  
83 (Kinetoplastida) and its intracellular bacterial symbiont. *B. saltans* is a heterotrophic,  
84 phagocytic bacteriovore found in freshwater and marine habitats worldwide, and is among  
85 the closest free-living relatives of trypanosomatid parasites (14). Within the trypanosomatids,  
86 three parasitic lineages, *Novyomonas*, *Phytomonas* and the Strigomonadinae, are known to  
87 contain a  $\beta$ -proteobacterial symbionts (15-17). These symbionts are mutualistic, cooperating  
88 in various metabolic pathways that provide essential amino acids and vitamins to the host  
89 (18-20). Although these endosymbionts are all mutualists, it is clear that parasitic  
90 kinetoplastids have acquired endosymbionts independently and relatively often (21). *B.*

91 *saltans* is a free-living kinetoplastid, but microscopic examination has established that it too  
92 possesses endosymbiotic bacteria (22-24), whose precise identity is unknown.

93

94 We characterized the cytoplasmic bacterium inhabiting *B. saltans*, which we name  
95 *Candidatus* Bodocaedibacter vickermanii, using a combination of genome sequencing,  
96 epifluorescence microscopy and serial block-face scanning electron microscopy (SBF-SEM).  
97 We then examined the endosymbiont genome sequence for putative function and identified a  
98 type VI secretion system and three chromosomal operons that are predicted to function as  
99 toxin-antitoxin systems. We therefore tested whether *Bodo* was dependent on its symbiont,  
100 potentially driven by these toxin-antitoxin systems, showing that antibiotic treatment results  
101 in rapid death of *B. saltans*, consistent with an addiction hypothesis.

102

## 103 **Material and Methods**

104

### 105 *DNA sequencing and genome assembly*

106

107 *Bodo saltans* cells were grown in 0.05% yeast extract in the presence of *Klebsiella*  
108 *pneumoniae* ATCC 13883 as prey. To exclude extracellular bacteria from the DNA  
109 extraction, cells were sorted by size using a BD FACS Aria cell sorter (Becton- Dickinson,  
110 USA). DNA was extracted from sorted cells using a Qiagen MagAttract HMW DNA Kit.  
111 DNA quality was assessed using a Qubit fluorometer (Thermo Fisher Scientific, USA) and  
112 Nanodrop instrument (Thermo Fisher Scientific, USA). A 20Kb insert library was prepared  
113 and sequenced on the PacBio Sequel platform (Pacific Biosciences). To assess *K.*  
114 *pneumoniae* contamination, reads were mapped using Bwa v0.7 to the published *B. saltans*  
115 genome sequence (CYKH01000000) and analysed with Samtools v0.1.18 (25). DNA

116 sequence assembly was carried out using Canu v1.5 (26). To identify all distinct bacterial  
117 sequences present, rRNA reads were filtered using SortMeRNA v2.1 (27), which identified a  
118 single candidate endosymbiont. *De novo* assembly showed the presence of only one contig  
119 belonging to the same bacterium with terminal overlaps, indicating a complete circular  
120 chromosome. The endosymbiont genome sequence was circularized using the Amos package  
121 v3.1.0 (28) and constituent reads were mapped back to check for mis-assembly.

122

### 123 *Endosymbiont genome annotation*

124

125 Genome annotation was carried out using Prokka v1.12 (29) complemented with BLASTp  
126 and InterProScan matches obtained using BLAST2GO v5.0 (30). Presence of prophage  
127 sequences were checked with PHAST (31). Genes containing a canonical signal peptide were  
128 predicted with SignalP 4.1 (32). Proteins with eukaryotic like domains were identified with  
129 EffectiveELD (33). Secretome P was used to predict genes encoding proteins secreted by  
130 non-classical pathway (34). Membrane transporters were predicted using TransportTP (35)  
131 and transporters were classified using the BLAST tool of the Transport Classification  
132 DataBase (36). HHsearch (37) was used to search for distant relationships between putative  
133 toxin-antitoxin system components and known structures at the Protein Data Bank  
134 (PDB;(38)) or protein families in the Pfam database (39). Three iterations of jackhmmer (40)  
135 searching against the UniClust database (41) were used to generate the sequence profiles for  
136 comparison with database entries. 16S rRNA sequences were predicted using RNAmmer  
137 v1.2 and EzBioCloud was used for taxonomical identification of the bacterial lineage (42).

138

### 139 *Phylogenetic analysis and comparative genomics*

140

141 OrthoMCL v2.0.9 was used to cluster orthologous genes shared by the *Bodo* endosymbiont  
142 with 12 related alpha-proteobacterial genome sequences (43). Protein sequences encoded by  
143 187 conserved genes from the 14 bacterial genomes were aligned using ClustalW (44).  
144 Prottest v3.0 was used to check for the optimal amino acid substitution model for phylogeny  
145 estimation (45). An LG+I+G model was applied in RaxML to estimate a maximum  
146 likelihood tree with 1000 non-parametric bootstrap replicates (46). BLAST-based Average  
147 Amino Acid Identity (AAI) values amongst the 13 genomes were calculated using AAI  
148 calculator (47). MAPLE 2.3.0 was used to identify and compare the completeness of various  
149 metabolic pathways in these endosymbiont genomes (48). Genomaple 2.3.2 was used to  
150 compare the metabolic pathways of endosymbiont and *B. saltans* (48).

151

#### 152 *Fluorescent in situ hybridization (FISH)*

153

154 The endosymbiont 16S rRNA sequence was integrated into the SILVA database using the  
155 web-based SINA aligner (49, 50). This alignment was further merged with SILVA Ref NR  
156 99 (51) using the ARB package and the probe design tool was used to select FISH probes  
157 specific for the endosymbiont genome. (52). The probes were tested for mismatch analysis  
158 using mathFISH, probeCheck and BLAST (53, 54). *B. saltans* cells were fixed using 4%  
159 paraformaldehyde and spotted on 0.1 % gelatin coated slides. Slides were dehydrated with  
160 50%, 80% and 100% ethanol consecutively before hybridization with the probe (50 ng/μl) at  
161 46°C. The probe was labelled with cyanine dye  
162 ([[CY3]CGAAGTGAAATCTACGTCTCCGT)) and hybridized with 15% formamide in  
163 three independent replicates. Counterstaining of the cells was achieved using  
164 VECTASHIELD Antifade Mounting Medium with DAPI.

165

166 *Electron microscopy*

167

168 Cells were fixed in 2.5% glutaraldehyde (Wt/Vol) in 0.1M phosphate buffer (pH7.4) in Pelco  
169 Biowave (Ted Pella Inc.) and washed twice in 0.1M PB before embedding in 3% agarose.  
170 Agarose embedded cell pellets were post-fixed and stained as described previously (55),  
171 except for use of 0.1% thiocarbohydrazide as a mordant. For TEM, after UA staining samples  
172 were embedded with TAAB medium Premix resin in silicone moulds and Beem capsules.  
173 Ultrathin serial section (70-75nm) were cut on an UC6 ultra-microtome (Leica, Vienna)  
174 collected on formvar coated copper grids, before viewing at 120KV in a FEI Tecnai G2  
175 Spirit. Images were taken using a MegaView III camera and multiple Image Alignment  
176 (MIA) was used to create a high-resolution overview of areas of interest.

177

178 For SBF-SEM, cell pellets were embedded with TAAB hard premix resin in plastic dishes.  
179 Excess resin was removed before the block was mounted onto a cryo pin, cell side up, using  
180 silver conductive epoxy. Targeted trimming created a block face of cells 500 $\mu$ m x 500 $\mu$ m.  
181 Samples were painted and dissected as previously described (55). To mitigate charge build up  
182 and maximize image quality, imaging conditions were as follows: low vacuum mode with a  
183 chamber pressure of 70 Pa. Low accelerating voltage (1.7kV), dwell time per pixel (14 $\mu$ s),  
184 magnification (5040 $\times$ ) pixel size 5.4 nm in x and y, frame width 6144  $\times$  6144, section  
185 thickness 100 nm over 104 sections. Amira 6.5.0 was used to analyse the SBF-SEM images  
186 and generate a 3D model for the cell.

187

188 *Attempt to cure the symbiont with Rifampicin treatment*

189



190 Besides *B. saltans*, two parasitic and asymbiotic kinetoplastids, *Trypanosoma theileri* and  
191 *Leptomonas costaricensis*, were treated with rifampicin (20 µg/ml), alongside control  
192 populations. To avoid impacts of rifampicin on *Bodo* mediated through changes in bacterial  
193 prey abundance, a rif-resistant prey strain of *Klebsiella* was developed for these experiments.  
194 The number of kinetoplastid cells was counted at 0 hours and after 24 hours of treatment in  
195 control and treated flasks. The experiment was repeated three times and statistical  
196 significance of changes in cell number between species were analysed using ratio paired T-  
197 test.

198

#### 199 *Bodo saltans* RNA-sequencing

200

201 *B. saltans* cells were treated with gentamicin (50 µg/ml) before RNA extraction. Total RNA  
202 was extracted from cells and rRNA was depleted using RiboZero rRNA depletion kit  
203 (Epidemiology). A strand-specific library was constructed with the NEBNext Ultra  
204 Directional RNA library preparation kit (NEB). Paired end 2x150 bp sequencing was carried  
205 out on the Illumina platform. Raw reads were mapped on to the endosymbiont genome  
206 sequence using bwa v0.7.12 and low quality read alignment were removed using samclip  
207 (<https://github.com/tseemann/samclip>) and default parameters. Sort read alignments were  
208 visualised with the IGV 2.8.6 tool, while strand-specific read quantitation was performed  
209 with the SeqMonk program (<https://www.bioinformatics.babraham.ac.uk/projects/seqmonk/>).  
210 To account for the presence of low DNA contamination in our library, a Difference  
211 Quantitation correction was applied. Read counts for each gene were calculated as the read  
212 counts originated from the opposite strand (template strand) minus the read counts from the  
213 same strand (coding strand) and normalized to the length of each gene (RPK).

214

215 *Data availability*

216

217 The *Candidatus* *Bodocaedibacter vickermanii* genome assembly has been submitted to NCBI  
218 under accession number CP054719. Raw PacBio genomic reads and Illumina RNA-Seq reads  
219 were submitted to Sequence Read Archive (SRA) database under the accession number  
220 SRR11932788 and SRR11935165 respectively.

221

## 222 **Results**

223

### 224 ***A Bodo saltans* endosymbiont of the Paracaedibacteraceae**

225

226 A single PacBio Sequel sequencing run generated 697,281 reads; of these, ~78% mapped to  
227 the *B. saltans* genome. Multiple proteobacterial genomes were discovered among the  
228 assembled contigs (Supplementary figure 1). Analysis of prokaryotic rRNA reads identified  
229 four bacterial taxa; *Klebsiella*, *Cupriavidus*, *Delftia* (each 100% identical with environmental  
230 sequences and assumed to derive from prey bacteria in the cell culture), and an unknown  
231 bacterium with greatest sequence identity (98.59%) to uncultured bacterial sequences  
232 belonging to Family Paracaedibacteraceae, followed by *Paracaedibacter* (86.89%). Given  
233 that this fourth taxon has such low sequence identity with any defined genus, we propose that  
234 it represents the endosymbiont and hereafter refer to it as *Candidatus* *Bodocaedibacter*  
235 *vickermanii* (Cbv) gen. nov. sp. nov.. The organism is named after Keith Vickerman (1933-  
236 2016), author of seminal microscopic studies of diverse kinetoplastids, including *B. saltans*.

237

### 238 **General features of the *Candidatus* *Bodocaedibacter vickermanii* genome**

239

240 The genome containing the *Candidatus* Bodocaedibacter vickermanii rRNA sequence was  
241 assembled as a complete chromosome, 1.39 Mb in size and with an average coverage of  
242 212x. The GC skew graph (Fig. 1A) shows the pattern typical of a complete bacterial  
243 chromosome, transitional points referring to the origin and terminus of replication. The  
244 genome is 40.7% GC in content and encodes 1214 putative CDS, 40 tRNA and 2 rRNA-  
245 encoding operons (both rRNA operons have 16S and 23S rRNA genes in close vicinity,  
246 separated by two tRNAs). The genome also possesses two incomplete prophage elements  
247 (CPBP\_00240-CPBP\_00250; CPBP\_00316-CPBP\_00324).

248

249 Among sequenced genomes (Table 1), the *Ca. B. vickermanii* genome sequence is most  
250 closely related to a metagenomics sequence assembly from Canadian waste water  
251 (UBA6184) (56), and thereafter to various endosymbiont genomes of the Holosporales (86-  
252 87% 16S rRNA sequence identity). 27% of gene sequences in the *Bodo* symbiont genome  
253 encode uncharacterized proteins found mostly in *Ca. B. vickermanii* and the UBA6184  
254 metagenome (Fig. 1B). A majority (~67%) of putative coding sequences were placed into one  
255 of 20 functional categories of Clusters of Orthologous Groups of proteins (COG), shown in  
256 Fig. 1C, while 18% of annotated proteins were categorized as having ‘unknown function’.

257

### 258 **Microscopy indicates this microbe represents an intracellular symbiont**

259

260 To confirm that the *Ca. B. vickermanii* sequence is correctly attributed to an intracellular  
261 endosymbiont, we used Fluorescent *in situ* Hybridization (FISH) and *Ca. B. vickermanii* 16S  
262 rRNA sequence probes. Cy-3 labelled probes bound to bacterial DNA on fixed *B. saltans*  
263 cultures, which were visualized using DIC microscopy (Fig. 2A). Stained *B. saltans* nuclei  
264 and kinetoplast are seen in blue channel (Fig. 2B) and bacterial spots are seen in red channel

265 (Fig. 2C). A merged image from (Fig. 2D) shows that the bacteria are found adjacent to the  
266 *B. saltans* nucleus and are not observed extracellularly.

267

268 Electron microscopy was used to further define the intracellular niche. In the TEM images  
269 (Fig. 2E), a large nucleus surrounded by double membrane occupies the cell centre. The  
270 kinetoplast is positioned consistently adjacent to basal bodies. Multiple mitochondrial  
271 sections are seen along the cellular periphery. Food vacuoles, enclosing engulfed bacteria, are  
272 usually evident towards the posterior end. In addition to these typically kinetoplastid features,  
273 we identified rod-shaped bacteria-like structures that are 0.9-1.2  $\mu\text{m}$  in length and 0.3-0.4  $\mu\text{m}$   
274 in diameter and often surrounded by an electron lucid halo (Fig. 2F-2G). These are consistent  
275 with endosymbiont cells previously observed in *B. saltans* (23, 24).

276

277 3-D models generated from SBF-SEM imaging further resolved the disposition of these rod-  
278 shaped structures. Fig. 3 shows the bean-shaped *B. saltans* cell with characteristic  
279 kinetoplastid features. In this 3-D rendering, rod-shaped bacterial cells are free in the  
280 cytoplasm, close to the nucleus. The number of bacterial cells varied from 3 to 10 (N=40).  
281 Where a higher bacterial count was observed, a membrane enveloping those cells adjacent to  
282 the *Bodo* nucleus was often seen, similar to that previously observed (24). This could be the  
283 nuclear membrane enveloping the endosymbionts prior to cell division and distribution into  
284 daughter cells.

285

286 ***Ca. Bodocaedibacter* is a novel genus in a clade of alpha-proteobacterial endosymbionts**

287

288 A maximum likelihood phylogenetic tree was estimated from an alignment of 187 single  
289 copy core genes from 13 genomes belonging to alpha-proteobacterial endosymbionts of

290 protists of families Paracaedibacteraceae, Caedimonadaceae, Midichloriaceae and  
291 Holosporaceae (Table 1). The genome of *Magnetococcus marinus*, belonging to basal lineage  
292 of alpha-proteobacteria, was used as an outgroup. The tree places the *Bodo* endosymbiont  
293 among other Holosporales and Rickettsiales endosymbionts of amoebae and ciliates, forming  
294 a clade with *Holospora*, *Caedibacter* and *Paracaedibacter*-like organisms (Fig. 4). As with  
295 the 16S rRNA homology analysis, the *Ca. B. vickermanii* genome grouped most closely with  
296 a wastewater metagenome (UBA6184). Branch lengths are long, consistent with these higher-  
297 level taxonomic comparisons. We examined the average amino acid identity (AAI) values  
298 between the *Bodo* endosymbiont and the 13 related genomes (Fig. 4) and, with the exception  
299 of UBA6184, AAI values for all related genomes are lower than the conventional genus  
300 boundary of 55% (57), indicating that *Ca. B. vickermanii* and UBA6184 represent a novel  
301 genus.

302

303 Analysis of gene content using OrthoMCL (38) shows that these 13 endosymbiotic genomes  
304 share a core repertoire of 242 genes, and typically <50% of their total gene repertoire (Fig. 4).  
305 Mapping these gene sets to KEGG pathways indicates that many are involved in central  
306 metabolism and information processing (Supplementary figure 2).

307

### 308 **The *Ca. B. vickermanii* genome has limited metabolic capacity**

309

310 The KEGG classifications of coding sequences in the *Ca. B. vickermanii* genome and 12  
311 related endosymbiont sequences show that the *Bodo* endosymbiont has a small genome and  
312 relatively limited metabolic capacity (Table 1). We calculated Module Completion Ratios  
313 (MCR) for purine metabolism, pyrimidine metabolism, amino acid metabolism, polyamine  
314 biosynthesis, cofactor and vitamin biosynthesis pathways using MAPLE (48) (Supplementary

315 Fig. 3). While often present in related genomes, several of these pathways are either  
316 completely or partially absent in *Ca. B. vickermanii*. For example, it lacks biotin,  
317 pantothenate and coenzyme A biosynthesis pathways entirely, and encodes only five out of  
318 nine genes in the ubiquinone biosynthesis pathway. Conversely, *Ca. B. vickermanii* possesses  
319 diverse membrane transporter genes for metabolite acquisition. The TransportTP (35) server  
320 identified 81 genes encoding membrane transporters in *Ca. B. vickermanii*, more than  
321 *Holospira* genomes (56-67) but rather fewer than other *Caedibacter/Paracaedibacter*  
322 genomes (102-148).

323

324 A full account of all transporter genes, classified using the Transporter Classification  
325 Database (36), is shown in Supplementary Table 1. These include genes associated with  
326 amino acid transport, metabolite transport (e.g. Drug/Metabolite Transporter (DMT) family  
327 (n=2)), the Major Facilitator Superfamily (MFS) (n=22), and the ATP-binding Cassette  
328 (ABC) superfamily (n=27). There are also genes encoding for exporter proteins like the  
329 Resistance-Nodulation-Cell Division (RND) Superfamily (n=6) and the  
330 Multidrug/Oligosaccharidyl-lipid/Polysaccharide (MOP) Flippase Superfamily (n=4).

331

332 We also examined the possibility that metabolic pathways are conducted cooperatively, with  
333 component genes being drawn from both host and endosymbiont genomes, which might  
334 indicate a mutualism. Only two pathways, lysine and threonine biosynthesis, appeared as  
335 potential candidates for co-operation, as shown in Supplementary figure 4. These two  
336 instances aside, most of the pathways associated with essential amino acids, vitamins and  
337 cofactor biosynthesis were lacking in both organisms, quite unlike the mutualistic *Novymonas*  
338 and Strigomonadinae endosymbiosis (18-20), indicating that *B. saltans* remains firmly  
339 heterotrophic (Supplementary figure 5). Taken together, this does not suggest that *Ca. B.*

340 *vickermanii* provides obvious metabolic benefit to *B. saltans*; indeed, the endosymbiont  
341 appears to be nutritionally dependent on its host.

342

343 **The *Ca. B. vickermanii* genome encodes a Sec pathway and Type VI Secretion System**  
344 **(T6SS)**

345

346 We examined the endosymbiont genome for various secretion systems that could facilitate  
347 communication with the host. This gram-negative bacterium contains the cellular components  
348 for a specific Type VI Secretion System (T6SS) and the general secretion (Sec) pathway. The  
349 *Ca. B. vickermanii* genome encodes most of the essential T6SS components, namely genes  
350 associated with membrane complex (tssL and tssM), baseplate complex (tssA, tssE, tssF,  
351 tssG, tssK and tssI/VgrG) and tail complex (tssB and tssC). Analysis with InterproScan also  
352 identified a tssJ-like gene (CPBP\_00933) encoding a T6SS-associated lipoprotein and a gene  
353 (CPBP\_00987) encoding a putative Hcp-like superfamily protein. RNA-seq analysis  
354 confirmed that these genes are actively transcribed, albeit at low levels (Supplementary table  
355 2).

356

357 In Paracaedibacteraceae and Caedimonadaceae genomes T6SS core genes are organised at  
358 four or more different genomic locations in a conserved arrangement: [tssG-tssF], [tssB-tssC-  
359 hcp], [tssK-tssL-tssM-tssA], and [yqwqK-vgrG]. The *Ca. B. vickermanii* genome complies  
360 with this convention (Supplementary Fig. 6), indicating that the system could be functional in  
361 *Ca. B. vickermanii*, as in related endosymbionts (58-61).

362

363 The web-based server Bastion6 was used to predict for proteins potentially secreted by the  
364 T6SS (62). This machine learning-based algorithm identified 117 proteins as putative type VI

365 secretion effectors (T6SE) (Supplementary table 3), which included various enzymes,  
366 flagellar proteins, membrane proteins and numerous uncharacterized proteins.

367

368 The Sec pathway is a major pathway for protein translocation across the cell membrane (63).

369 The *Ca. B. vickermanii* genome includes genes for a putative motor protein SecA, translocase

370 complex SecYEG, and the auxillary components SecDF-YajC and YidC. It also encodes the

371 proteins required for co-translational targeting (signal recognition particle proteins and

372 receptor FtsY), as well as post-translational targeting (protein targeting component SecB). To

373 discover proteins that may be targeted by the Sec pathway for integration or secretion outside

374 the cell, we identified 158 coding sequences containing a signal sequence using SignalP 4.1

375 (32) (Supplementary Table 4). Of these, 105 proteins (66.4%) are uncharacterized and only

376 21 contain predicted transmembrane helices, indicating that most are probably secreted.

377

378 The genes predicted to encode for proteins with a secretion signal include various enzymes

379 (xylanase, serine endoprotease, proteases, phospholipase, methyltransferase and

380 acetyltransferase), flagellar proteins and membrane transporters. They also include two genes

381 encoding proteins containing tetratricopeptide-repeats, and one gene for ankyrin-repeat

382 containing protein, which are both typical eukaryotic protein domains involved in protein-

383 protein interactions. A majority of these genes (130/158) have homologs only in the

384 UBA6184 genome. The 105 genes encoding uncharacterized proteins with secretory signals

385 are also limited to these two bacterial genomes, indicating this lineage has evolved a

386 considerable repertoire of specific secreted proteins.

387

388 In case non-classical pathways are used to secrete *Ca. B. vickermanii* proteins, we analysed

389 predicted protein sequences with SecretomeP (34). There are 204 proteins that returned a



390 score above the threshold, 59 of which also returned a significant result with SignalP  
391 (Supplementary Table 4). Also among these cases were genes encoding proteins with  
392 homology to known cellular toxins, which led to the discovery of three putative novel toxin-  
393 antitoxin islands in the *Bodo* endosymbiont.

394

395 **Multiple polymorphic toxin systems are a possible mechanism for addiction.**

396

397 Bacterial Polymorphic Toxin Systems (PTS) such as the Rhs (64) and CDI (65) systems  
398 comprise genes encoding toxins and their cognate anti-toxins in characteristic operons (66).  
399 Typically, a toxin gene encodes a large multi-domain protein contains an N-terminal  
400 secretion signal followed by a toxin domain. A toxin gene is immediately followed by a gene  
401 encoding an anti-toxin, (or ‘immunity protein’), capable of neutralising the toxin. This pair is  
402 often followed by additional ‘orphan modules’, each encoding an alternative toxin with its  
403 cognate antitoxin. Genes in these orphan modules may often contain a repeat region  
404 homologous to part of the toxin gene at the beginning of the operon. This repeat enables  
405 recombination between the full-length toxin gene and an orphan module to generate an  
406 alternative toxin protein.

407

408 We identified three genomic regions coding for putative PTS (Fig 5; Table 2). The putative  
409 toxin proteins identified here have no structural homology with known proteins, nor is there  
410 any homology between the three putative PTS. Nevertheless, the three regions show typical  
411 PTS characteristics. These include the presence of regions of homology between putative  
412 toxin proteins in the N-terminal part preceding the toxin domains (Fig 5) and the organisation  
413 of putative toxin and antitoxin proteins across the loci (Table 2), which leads us to conclude  
414 that they may represent novel PTS. In many cases, the relationships used to infer toxin or

415 antitoxin function are characterised by low degrees of sequence identity, but the HHsearch  
416 (37) probability scores are all >80% (and often much higher), which supports genuine  
417 homology.

418

419 In PTS I, the full-length toxin (CPBP\_00219) terminates in an AHH nuclease domain.  
420 Accordingly, the following gene (in the coding direction) CPBP\_00218 encodes a protein  
421 matching Immunity Protein 43 (Pfam: PF15570), predicted to act as antidote to the nuclease  
422 activity (67). Interestingly, it also strongly matches two Pfam families, Gmx\_para\_CXXCG  
423 (PF09535) and DUF1629 (PF00791), suggesting that these too may encode antitoxins. These  
424 genes are followed by two orphan modules, each containing a toxin and an antitoxin (Table  
425 2). The next three genes encode proteins without recognisable homology to known structures  
426 or protein families, but CPBP\_00210 clearly matches Immunity protein 49 (Pfam: PF15575),  
427 which is found in other PTS (67). This suggests, given their context, that CPBP\_00213-  
428 CPBP\_00212 and CPBP\_00211- CPBP\_00210 may encode third and fourth orphan modules  
429 respectively with CPBP\_00211 (matching Domain of Unknown Function DUF1837;  
430 PF08878) coding for a novel toxin domain.

431

432 The full-length toxin of PTS II (encoded by CPBP\_00656) contains a Tox-HNH-HHH  
433 nuclease domain (PF15637) and is followed by its cognate antitoxin encoded by  
434 CPBP\_00655. Two orphan modules follow, each containing toxin-antitoxin pairs that are  
435 unambiguously homologous to well-characterised families (Table 2). However, the  
436 CPBP\_00654 sequence contains no homology to the predicted N-terminal domain of the  
437 CPBP\_00656 toxin; therefore, it is unclear whether the CPBP654- CPBP653 orphan module  
438 is functional.

439

440 Sequence homology in the predicted N-terminal regions of CPBP\_00962, CPBP\_00966,  
441 CPBP\_00968, CPBP\_00970 and the presumed (given its position) full-length toxin encoded  
442 by CPBP\_00960 indicate the presence of a third PTS (Fig 5). Unlike PTS I and II, most  
443 predicted proteins at the PTS III locus lack recognisable domains; only CPBP\_00966 and  
444 CPBP\_00967 display homologies to known PTS proteins, a Metallopeptidase toxin 5  
445 (PF15641; (67)), and Colicin-like immunity protein (PF09204) respectively. Thus, the  
446 specification of functional orphan modules is least certain for this PTS, and it may be rich in  
447 novel toxin and antitoxin genes.

448

449 RNA-seq analysis of bulk *B. saltans* cell culture confirmed that genes comprising the putative  
450 PTS systems are all transcribed (Supplementary table 2; Supplementary figure 7). A few  
451 proteins of each of these polymorphic toxin systems were also predicted as type VI secretion  
452 effector *in silico* (Supplementary table 3), suggesting the putative role of T6SS in transport  
453 and secretion of the involved toxin-antitoxin pairs.

454

455 Besides these three PTS, the endosymbiont genome also encodes for a toxin-antitoxin pair  
456 associated with T6SS. It has an anti-toxin gene (YwqK family protein), upstream of one of  
457 the VgrG genes, as previously observed (58, 68).

458

#### 459 **Attempts to cure the symbiont result in host death**

460

461 *B. saltans* cells were treated with antibiotics to cure them of endosymbiotic bacteria.  
462 Treatment with rifampicin (20 µg/ml) led to a decrease in cell count after 24 hours of  
463 rifampicin treatment compared to the untreated cells. Cell counts from three independent  
464 experiments were compared and the difference in cell growth rate was found to be

465 statistically significant (Paired t-test:  $t = 5.906$ , d.f. = 2,  $p = 0.0275$ ). By contrast, when the  
466 same treatment was applied to cell cultures of two other kinetoplastids that lack  
467 endosymbionts (*Trypanosoma theileri* and *Leptomonas costaricensis*), rifampicin had no  
468 effect on cell number (Fig. 6).

469

## 470 **Discussion**

471

472 The *B. saltans* endosymbiont is identified here as an alpha-proteobacterium and a novel  
473 genus of the Holosporales, *Ca. Bodocaedibacter*. The complete genome indicates that the  
474 endosymbiont is incapable of synthesizing essential amino acids, vitamins and cofactors, but  
475 instead possesses an arsenal of membrane transporters for importing essential nutrients, a  
476 specialized secretory pathway and three putative PTS operons. Antibiotic treatment of *B.*  
477 *saltans* results in host cell death, indicating that *Ca. B. vickermanii* is essential for host  
478 viability, despite the meagre benefits it seems to offer. Certainly, the *Bodo* endosymbiont is  
479 unrelated, phylogenetically and physiologically, to the obligate bacterial endosymbionts of  
480 parasitic kinetoplastids such as *Ca. Kinetoplastibacterium* (Alcaligenaceae) (16, 69) and *Ca.*  
481 *Pandoraea* (Burkholderiaceae) (15). These beta-proteobacterial symbionts can synthesize  
482 various essential amino acids independently (*Ca. Pandoraea*) (18), or in a cooperative manner  
483 with the host (*Ca. Kinetoplastibacterium*) (19), and also provide cofactors, vitamins and  
484 heme to their hosts (70). Since *Ca. B. vickermanii* lacks the genes to perform such functions,  
485 we hypothesize that host dependency in its case arises from the expression of “addictive”  
486 bacterial toxin-antitoxin proteins.

487

488 This idea is immediately plausible when we consider the ecological strategies of related  
489 endosymbionts. While *Holospora* may increase host survival under adverse conditions (71,  
490 72), it restrains host growth in normal conditions (73, 74). An *Acanthamoeba* endosymbiont,  
491 *Ca. Amoebophilus asiaticus*, is parasitic; its genome lacks essential metabolic pathways but  
492 instead contains diverse genes shown to modulate host gene expression (59). Another  
493 *Acanthamoeba* endosymbiont, *Ca. Jidaibacter acanthamoeba*, also encodes many proteins  
494 with eukaryotic-like domains thought to interact with the host (75). Although the *Ca. B.*  
495 *vickermanii* genome encodes few eukaryotic-like domains, there are 339 uncharacterized  
496 proteins, most of which are lineage-specific and predicted to be secreted; such proteins could  
497 include factors for manipulating host physiology.

498

499 Perhaps the most pertinent comparison, however, is *Caedibacter*, an endosymbiont of  
500 *Paramecium* that is known for its ‘Killer trait’, which ensures its transmission at cell division  
501 (76). *Caedibacter* provides a growth advantage to *Paramecium* cells (72) but also has an  
502 adaptation to ensure its spread through the population. A portion of the endosymbiont  
503 population forms ‘R-bodies’ that are secreted outside the host cell, where they are lethal to  
504 *Paramecium* lacking the endosymbiont. In effect, the R-bodies become a toxin, against which  
505 *Caedibacter* provides protection, meaning that this is not a simple mutualism. The  
506 phylogenetic position of *Ca. B. vickermanii* among these various endosymbionts, with their  
507 ambiguous attitudes towards their hosts, makes it plausible that *Ca. B. vickermanii* too has an  
508 antagonistic mechanism for maintaining endosymbiosis.

509

510 Mechanisms like these are often described as evolved dependencies, exemplified by selfish  
511 genetic elements such as plasmids, which express a toxin-antitoxin (TA) system causing post-  
512 segregation killing or addiction (77). TA systems in bacteria can also lead to programmed

513 cell death (78) or persistence in response to stress conditions (79). Another evolved  
514 dependency involves the wasp *Asobara tabida* and its symbiont *Wolbachia*, which the wasp  
515 requires for oogenesis and formation of a viable offspring. As *Wolbachia* is primarily  
516 transmitted through females, loss of the same strain of *Wolbachia* in males can result in  
517 cytoplasmic incompatibility, leading to offspring mortality (80, 81). Similarly, in *C. elegans*,  
518 the peel-zeel system causes offspring to die if they do not carry the same allele as the sperm  
519 parent (12). These instances of evolved dependency on a particular allele (peel-zeel), a  
520 genetic element (plasmids), or an endosymbiont (bacteria) carrying the relevant genes are  
521 fascinating examples of addiction, where losing the addictive element can lead to host death.  
522 The presence in *Ca. B. vickermanii* of three, actively transcribed PTS and a T6SS that could  
523 convey these effector proteins, coupled with an inability to survive in an aposymbiotic state,  
524 suggest that *B. saltans* is also subject to an evolved dependency.

525

526 Symbiosis is a well-known and intricate phenomenon found at various levels of biological  
527 organization and prokaryotic endosymbionts have been instrumental in the adaptive radiation  
528 of eukaryotes (2, 82). The Family Paracaedibacteraceae is associated with diverse protists,  
529 including Rhizaria, Excavates and Amoebozoans (83-85), and now kinetoplastid flagellates.  
530 Given the diversity of their hosts, and the evolutionary distances between them, this alpha-  
531 proteobacteria lineage would seem to have been associated with eukaryotes throughout their  
532 evolutionary diversification. Like other members of the lineage, the metabolic insufficiency,  
533 specialized secretory pathway and toxin-antitoxin systems of the *Ca. B. vickermanii* genome  
534 indicate that this long relationship has not been exactly harmonious, the genomes bears  
535 witness to a struggle to retain the cooperation of their eukaryotic hosts.

536

537

## 538 **Acknowledgements**

539

540 This research was supported by a Leverhulme Trust Research Grant to APJ (RPG-2014-005).

541 We thank Alison Beckett, Department of Cellular and Molecular Physiology, for helping in

542 electron microscopy studies. We acknowledge Liverpool Centre for Cell Imaging (CCI) for

543 providing access to microscopy equipment and technical assistance.

544

## 545 **Competing Interests**

546

547 The authors declare that there are no competing interests.

548

## 549 **References**

550

551 1. Bennett GM, Moran NA. Heritable symbiosis: the advantages and perils of an

552 evolutionary rabbit hole. *Proceedings of the National Academy of Sciences*.

553 2015;112(33):10169-76.

554 2. Nowack EC, Melkonian M. Endosymbiotic associations within protists. *Philosophical*

555 *Transactions of the Royal Society B: Biological Sciences*. 2010;365(1541):699-712.

556 3. Bright M, Bulgheresi S. A complex journey: transmission of microbial symbionts.

557 *Nature Reviews Microbiology*. 2010;8(3):218-30.

558 4. Lowe CD, Minter EJ, Cameron DD, Brockhurst MA. Shining a light on exploitative

559 host control in a photosynthetic endosymbiosis. *Current Biology*. 2016;26(2):207-11.

- 560 5. Hurst GD, Frost CL. Reproductive parasitism: maternally inherited symbionts in a  
561 biparental world. *Cold Spring Harbor perspectives in biology*. 2015;7(5):a017699.
- 562 6. Douglas A. Nutritional interactions in insect-microbial symbioses: aphids and their  
563 symbiotic bacteria *Buchnera*. *Annual review of entomology*. 1998;43(1):17-37.
- 564 7. Houk E, and, Griffiths GW. Intracellular symbiotes of the Homoptera. *Annual review*  
565 *of entomology*. 1980;25(1):161-87.
- 566 8. Miller IM. Bacterial leaf nodule symbiosis. *Advances in botanical research*. 17:  
567 Elsevier; 1990. p. 163-234.
- 568 9. Lackner G, Partida-Martinez LP, Hertweck C. Endofungal bacteria as producers of  
569 mycotoxins. *Trends in microbiology*. 2009;17(12):570-6.
- 570 10. Dedeine F, Vavre F, Fleury F, Loppin B, Hochberg ME, Boulétreau M. Removing  
571 symbiotic *Wolbachia* bacteria specifically inhibits oogenesis in a parasitic wasp. *Proceedings*  
572 *of the National Academy of Sciences*. 2001;98(11):6247-52.
- 573 11. Yarmolinsky MB. Programmed cell death in bacterial populations. *Science*.  
574 1995;267(5199):836-8.
- 575 12. Seidel HS, Ailion M, Li J, van Oudenaarden A, Rockman MV, Kruglyak L. A novel  
576 sperm-delivered toxin causes late-stage embryo lethality and transmission ratio distortion in  
577 *C. elegans*. *PLoS Biol*. 2011;9(7):e1001115.
- 578 13. Shropshire JD, On J, Layton EM, Zhou H, Bordenstein SR. One prophage WO gene  
579 rescues cytoplasmic incompatibility in *Drosophila melanogaster*. *Proceedings of the National*  
580 *Academy of Sciences*. 2018;115(19):4987-91.
- 581 14. Hughes AL, Piontkivska H. Phylogeny of Trypanosomatidae and Bodonidae  
582 (Kinetoplastida) based on 18S rRNA: evidence for paraphyly of *Trypanosoma* and six other  
583 genera. *Molecular biology and evolution*. 2003;20(4):644-52.



- 584 15. Kostygov AY, Dobáková E, Grybchuk-Ieremenko A, Váhala D, Maslov DA, Votýpka  
585 J, et al. Novel trypanosomatid-bacterium association: evolution of endosymbiosis in action.  
586 MBio. 2016;7(2):e01985-15.
- 587 16. Teixeira MM, Borghesan TC, Ferreira RC, Santos MA, Takata CS, Campaner M, et  
588 al. Phylogenetic validation of the genera *Angomonas* and *Strigomonas* of trypanosomatids  
589 harboring bacterial endosymbionts with the description of new species of trypanosomatids  
590 and of proteobacterial symbionts. Protist. 2011;162(3):503-24.
- 591 17. Alves JM, Serrano MG, Maia da Silva F, Voegtly LJ, Matveyev AV, Teixeira MM, et  
592 al. Genome evolution and phylogenomic analysis of *Candidatus* Kinetoplastibacterium, the  
593 betaproteobacterial endosymbionts of *Strigomonas* and *Angomonas*. Genome biology and  
594 evolution. 2013;5(2):338-50.
- 595 18. Kostygov AY, Butenko A, Nenarokova A, Tashyreva D, Flegontov P, Lukeš J, et al.  
596 Genome of *Ca. Pandoraea novymonadis*, an endosymbiotic bacterium of the trypanosomatid  
597 *Novymonas esmeraldas*. Frontiers in microbiology. 2017;8:1940.
- 598 19. Alves JM, Klein CC, da Silva FM, Costa-Martins AG, Serrano MG, Buck GA, et al.  
599 Endosymbiosis in trypanosomatids: the genomic cooperation between bacterium and host in  
600 the synthesis of essential amino acids is heavily influenced by multiple horizontal gene  
601 transfers. BMC evolutionary biology. 2013;13(1):190.
- 602 20. Klein CC, Alves JM, Serrano MG, Buck GA, Vasconcelos ATR, Sagot M-F, et al.  
603 Biosynthesis of vitamins and cofactors in bacterium-harboring trypanosomatids depends on  
604 the symbiotic association as revealed by genomic analyses. PLoS One. 2013;8(11).
- 605 21. Harmer J, Yurchenko V, Nenarokova A, Lukeš J, Ginger ML. Farming, slaving and  
606 enslavement: histories of endosymbioses during kinetoplastid evolution. Parasitology.  
607 2018;145(10):1311-23.

- 608 22. Vickerman K, Preston TM. Comparative cell biology of the kinetoplastid flagellates.  
609 In: Lumsden WHR, Evans DA, editors. Biology of the Kinetoplastida. 1. New York:  
610 Academic Press; 1976. p. 35-130.
- 611 23. Burzell LA. Fine structure of *Bodo curvifilus* Griessmann (Kinetoplastida:  
612 Bodonidae). The Journal of protozoology. 1975;22(1):35-9.
- 613 24. Malysheva M, Karpova M, Frolov A. Mitosis of the free-living flagellate *Bodo*  
614 *saltans* strain Ps+ (Kinetoplastidea, Bodonida). Cell and Tissue Biology. 2007;1(4):364-73.
- 615 25. Li H, Handsaker B, Wysoker A, Fennell T, Ruan J, Homer N, et al. The sequence  
616 alignment/map format and SAMtools. Bioinformatics. 2009;25(16):2078-9.
- 617 26. Koren S, Walenz BP, Berlin K, Miller JR, Bergman NH, Phillippy AM. Canu:  
618 scalable and accurate long-read assembly via adaptive k-mer weighting and repeat separation.  
619 Genome research. 2017;27(5):722-36.
- 620 27. Kopylova E, Noé L, Touzet H. SortMeRNA: fast and accurate filtering of ribosomal  
621 RNAs in metatranscriptomic data. Bioinformatics. 2012;28(24):3211-7.
- 622 28. Treangen TJ, Sommer DD, Angly FE, Koren S, Pop M. Next generation sequence  
623 assembly with AMOS. Current Protocols in Bioinformatics. 2011;33(1):11.8. 1-.8. 8.
- 624 29. Seemann T. Prokka: rapid prokaryotic genome annotation. Bioinformatics.  
625 2014;30(14):2068-9.
- 626 30. Conesa A, Götz S, García-Gómez JM, Terol J, Talón M, Robles M. Blast2GO: a  
627 universal tool for annotation, visualization and analysis in functional genomics research.  
628 Bioinformatics. 2005;21(18):3674-6.
- 629 31. Zhou Y, Liang Y, Lynch KH, Dennis JJ, Wishart DS. PFAST: a fast phage search  
630 tool. Nucleic acids research. 2011;39(suppl\_2):W347-W52.
- 631 32. Petersen TN, Brunak S, Von Heijne G, Nielsen H. SignalP 4.0: discriminating signal  
632 peptides from transmembrane regions. Nature methods. 2011;8(10):785.

- 633 33. Eichinger V, Nussbaumer T, Platzer A, Jehl M-A, Arnold R, Rattei T. EffectiveDB—  
634 updates and novel features for a better annotation of bacterial secreted proteins and Type III,  
635 IV, VI secretion systems. *Nucleic acids research*. 2016;44(D1):D669-D74.
- 636 34. Bendtsen JD, Kiemer L, Fausbøll A, Brunak S. Non-classical protein secretion in  
637 bacteria. *BMC microbiology*. 2005;5(1):58.
- 638 35. Li H, Benedito VA, Udvardi MK, Zhao PX. TransportTP: a two-phase classification  
639 approach for membrane transporter prediction and characterization. *BMC bioinformatics*.  
640 2009;10(1):418.
- 641 36. Saier Jr MH, Tran CV, Barabote RD. TCDB: the Transporter Classification Database  
642 for membrane transport protein analyses and information. *Nucleic acids research*.  
643 2006;34(suppl\_1):D181-D6.
- 644 37. Söding J. Protein homology detection by HMM–HMM comparison. *Bioinformatics*.  
645 2005;21(7):951-60.
- 646 38. wwPDBconsortium. Protein Data Bank: the single global archive for 3D  
647 macromolecular structure data. *Nucleic acids research*. 2019;47(D1):D520-D8.
- 648 39. El-Gebali S, Mistry J, Bateman A, Eddy SR, Luciani A, Potter SC, et al. The Pfam  
649 protein families database in 2019. *Nucleic acids research*. 2019;47(D1):D427-D32.
- 650 40. Eddy SR. A new generation of homology search tools based on probabilistic  
651 inference. *Genome Informatics 2009: Genome Informatics Series Vol 23: World Scientific*;  
652 2009. p. 205-11.
- 653 41. Mirdita M, von den Driesch L, Galiez C, Martin MJ, Söding J, Steinegger M. Uniclust  
654 databases of clustered and deeply annotated protein sequences and alignments. *Nucleic acids*  
655 *research*. 2017;45(D1):D170-D6.

- 656 42. Yoon S-H, Ha S-M, Kwon S, Lim J, Kim Y, Seo H, et al. Introducing EzBioCloud: a  
657 taxonomically united database of 16S rRNA gene sequences and whole-genome assemblies.  
658 *International journal of systematic and evolutionary microbiology*. 2017;67(5):1613.
- 659 43. Li L, Stoeckert CJ, Roos DS. OrthoMCL: identification of ortholog groups for  
660 eukaryotic genomes. *Genome research*. 2003;13(9):2178-89.
- 661 44. Thompson JD, Gibson TJ, Higgins DG. Multiple sequence alignment using ClustalW  
662 and ClustalX. *Current protocols in bioinformatics*. 2003(1):2.3. 1-2.3. 22.
- 663 45. Darriba D, Taboada GL, Doallo R, Posada D. ProtTest 3: fast selection of best-fit  
664 models of protein evolution. *Bioinformatics*. 2011;27(8):1164-5.
- 665 46. Stamatakis A. RAxML version 8: a tool for phylogenetic analysis and post-analysis of  
666 large phylogenies. *Bioinformatics*. 2014;30(9):1312-3.
- 667 47. Rodriguez-R LM, Konstantinidis KT. The enveomics collection: a toolbox for  
668 specialized analyses of microbial genomes and metagenomes. *PeerJ Preprints*; 2016. Report  
669 No.: 2167-9843.
- 670 48. Arai W, Taniguchi T, Goto S, Moriya Y, Uehara H, Takemoto K, et al. MAPLE 2.3.  
671 0: an improved system for evaluating the functionomes of genomes and metagenomes.  
672 *Bioscience, biotechnology, and biochemistry*. 2018;82(9):1515-7.
- 673 49. Pruesse E, Peplies J, Glöckner FO. SINA: accurate high-throughput multiple  
674 sequence alignment of ribosomal RNA genes. *Bioinformatics*. 2012;28(14):1823-9.
- 675 50. Pruesse E, Quast C, Knittel K, Fuchs BM, Ludwig W, Peplies J, et al. SILVA: a  
676 comprehensive online resource for quality checked and aligned ribosomal RNA sequence  
677 data compatible with ARB. *Nucleic acids research*. 2007;35(21):7188-96.
- 678 51. Quast C, Pruesse E, Yilmaz P, Gerken J, Schweer T, Yarza P, et al. The SILVA  
679 ribosomal RNA gene database project: improved data processing and web-based tools.  
680 *Nucleic acids research*. 2012;41(D1):D590-D6.

- 681 52. Ludwig W, Strunk O, Westram R, Richter L, Meier H, Yadhukumar, et al. ARB: a  
682 software environment for sequence data. *Nucleic acids research*. 2004;32(4):1363-71.
- 683 53. Loy A, Arnold R, Tischler P, Rattei T, Wagner M, Horn M. probeCheck—a central  
684 resource for evaluating oligonucleotide probe coverage and specificity. *Environmental*  
685 *microbiology*. 2008;10(10):2894-8.
- 686 54. Yilmaz LS, Parnerkar S, Noguera DR. mathFISH, a web tool that uses  
687 thermodynamics-based mathematical models for in silico evaluation of oligonucleotide  
688 probes for fluorescence in situ hybridization. *Appl Environ Microbiol*. 2011;77(3):1118-22.
- 689 55. Booth DG, Beckett AJ, Molina O, Samejima I, Masumoto H, Kouprina N, et al. 3D-  
690 CLEM reveals that a major portion of mitotic chromosomes is not chromatin. *Molecular cell*.  
691 2016;64(4):790-802.
- 692 56. Parks DH, Rinke C, Chuvochina M, Chaumeil P-A, Woodcroft BJ, Evans PN, et al.  
693 Recovery of nearly 8,000 metagenome-assembled genomes substantially expands the tree of  
694 life. *Nature microbiology*. 2017;2(11):1533-42.
- 695 57. Rodriguez-R LM, Konstantinidis KT. Bypassing cultivation to identify bacterial  
696 species. *Microbe*. 2014;9(3):111-8.
- 697 58. George EE, Husnik F, Tashyreva D, Prokopchuk G, Horák A, Kwong WK, et al.  
698 Highly reduced genomes of protist endosymbionts show evolutionary convergence. *Current*  
699 *Biology*. 2020.
- 700 59. Schmitz-Esser S, Tischler P, Arnold R, Montanaro J, Wagner M, Rattei T, et al. The  
701 genome of the amoeba symbiont “*Candidatus Amoebophilus asiaticus*” reveals common  
702 mechanisms for host cell interaction among amoeba-associated bacteria. *Journal of*  
703 *bacteriology*. 2010;192(4):1045-57.

- 704 60. Brown A, Wasala SK, Howe DK, Peetz AB, Zasada IA, Denver DR. Comparative  
705 genomics of *Wolbachia*–*Cardinium* dual endosymbiosis in a plant-parasitic nematode.  
706 *Frontiers in microbiology*. 2018;9:2482.
- 707 61. Yang JC, Madupu R, Durkin AS, Ekborg NA, Pedamallu CS, Hostetler JB, et al. The  
708 complete genome of *Teredinibacter turnerae* T7901: an intracellular endosymbiont of marine  
709 wood-boring bivalves (shipworms). *PloS one*. 2009;4(7).
- 710 62. Wang J, Yang B, Leier A, Marquez-Lago TT, Hayashida M, Rocker A, et al.  
711 Bastion6: a bioinformatics approach for accurate prediction of type VI secreted effectors.  
712 *Bioinformatics*. 2018;34(15):2546-55.
- 713 63. Natale P, Brüser T, Driessen AJ. Sec-and Tat-mediated protein secretion across the  
714 bacterial cytoplasmic membrane—distinct translocases and mechanisms. *Biochimica et*  
715 *Biophysica Acta (BBA)-Biomembranes*. 2008;1778(9):1735-56.
- 716 64. Jackson AP, Thomas GH, Parkhill J, Thomson NR. Evolutionary diversification of an  
717 ancient gene family (*rhs*) through C-terminal displacement. *BMC genomics*. 2009;10(1):584.
- 718 65. Ruhe ZC, Low DA, Hayes CS. Bacterial contact-dependent growth inhibition. *Trends*  
719 *in microbiology*. 2013;21(5):230-7.
- 720 66. Jamet A, Nassif X. New players in the toxin field: polymorphic toxin systems in  
721 bacteria. *MBio*. 2015;6(3).
- 722 67. Zhang D, de Souza RF, Anantharaman V, Iyer LM, Aravind L. Polymorphic toxin  
723 systems: comprehensive characterization of trafficking modes, processing, mechanisms of  
724 action, immunity and ecology using comparative genomics. *Biology direct*. 2012;7(1):18.
- 725 68. Ibrahim M, Subramanian A, Anishetty S. Comparative pan genome analysis of oral  
726 *Prevotella* species implicated in periodontitis. *Functional & integrative genomics*.  
727 2017;17(5):513-36.

- 728 69. Votýpka J, Kostygov AY, Kraeva N, Grybchuk-Ieremenko A, Tesařová M, Grybchuk  
729 D, et al. *Kentomonas* gen. n., a New Genus of Endosymbiont-containing Trypanosomatids of  
730 Strigomonadinae subfam. n. Protist. 2014;165(6):825-38.
- 731 70. Alves JM, Voegtly L, Matveyev AV, Lara AM, da Silva FM, Serrano MG, et al.  
732 Identification and phylogenetic analysis of heme synthesis genes in trypanosomatids and their  
733 bacterial endosymbionts. PLoS one. 2011;6(8).
- 734 71. Fujishima M, Kawai M, Yamamoto R. *Paramecium caudatum* acquires heat-shock  
735 resistance in ciliary movement by infection with the endonuclear symbiotic bacterium  
736 *Holospora obtusa*. FEMS microbiology letters. 2005;243(1):101-5.
- 737 72. Fujishima M. Infection and maintenance of *Holospora* species in *Paramecium*  
738 *caudatum*. Endosymbionts in Paramecium: Springer; 2009. p. 201-25.
- 739 73. Görtz H, Fujishima M. Conjugation and meiosis of *Paramecium caudatum* infected  
740 with the micronucleus-specific bacterium *Holospora elegans*. European journal of cell  
741 biology. 1983;32(1):86-91.
- 742 74. Restif O, Kaltz O. Condition-dependent virulence in a horizontally and vertically  
743 transmitted bacterial parasite. Oikos. 2006;114(1):148-58.
- 744 75. Schulz F, Martijn J, Wascher F, Lagkouvardos I, Kostanjšek R, Ettema TJ, et al. A  
745 Rickettsiales symbiont of amoebae with ancient features. Environ Microbiol.  
746 2016;18(8):2326-42.
- 747 76. Kusch J, Görtz H-D. Towards an understanding of the killer trait: *Caedibacter*  
748 endocytobionts in Paramecium. Molecular Basis of Symbiosis: Springer; 2005. p. 61-76.
- 749 77. Werren JH. Selfish genetic elements, genetic conflict, and evolutionary innovation.  
750 Proceedings of the National Academy of Sciences. 2011;108(Supplement 2):10863-70.

- 751 78. Engelberg-Kulka H, Hazan R, Amitai S. mazEF: a chromosomal toxin-antitoxin  
752 module that triggers programmed cell death in bacteria. *Journal of cell science*.  
753 2005;118(19):4327-32.
- 754 79. Page R, Peti W. Toxin-antitoxin systems in bacterial growth arrest and persistence.  
755 *Nature chemical biology*. 2016;12(4):208.
- 756 80. Dedeine F, Bouletreau M, Vavre F. *Wolbachia* requirement for oogenesis: occurrence  
757 within the genus *Asobara* (Hymenoptera, Braconidae) and evidence for intraspecific variation  
758 in *A. tabida*. *Heredity*. 2005;95(5):394-400.
- 759 81. Dedeine F, Vavre F, Shoemaker DD, Boulétreau M. Intra-individual coexistence of a  
760 *Wolbachia* strain required for host oogenesis with two strains inducing cytoplasmic  
761 incompatibility in the wasp *Asobara tabida*. *Evolution*. 2004;58(10):2167-74.
- 762 82. Aanen DK, Hoekstra RF. The evolution of obligate mutualism: if you can't beat'em,  
763 join'em. *Trends in Ecology & Evolution*. 2007;22(10):506-9.
- 764 83. Hess S, Suthaus A, Melkonian M. “*Candidatus Finniella*”(Rickettsiales,  
765 Alphaproteobacteria), novel endosymbionts of viridiraptorid amoebflagellates (Cercozoa,  
766 rhizaria). *Appl Environ Microbiol*. 2016;82(2):659-70.
- 767 84. Georgiades K, Madoui M-A, Phuong Le CR, Raoult D. Phylogenomic analysis of  
768 *Odyssella thessalonicensis* fortifies the common origin of Rickettsiales, *Pelagibacter ubique*  
769 and *Reclimonas americana* mitochondrion. *PloS one*. 2011;6(9).
- 770 85. Kim E, Park JS, Simpson AG, Matsunaga S, Watanabe M, Murakami A, et al.  
771 Complex array of endobionts in *Petalomonas sphagnophila*, a large heterotrophic euglenid  
772 protist from Sphagnum-dominated peatlands. *The ISME journal*. 2010;4(9):1108-20.
- 773 86. Carver T, Thomson N, Bleasby A, Berriman M, Parkhill J. DNAPlotter: circular and  
774 linear interactive genome visualization. *Bioinformatics*. 2009;25(1):119-20.



775 87. Schindelin J, Arganda-Carreras I, Frise E, Kaynig V, Longair M, Pietzsch T, et al.  
776 Fiji: an open-source platform for biological-image analysis. *Nature methods*. 2012;9(7):676-  
777 82.  
778  
779  
780  
781  
782  
783  
784  
785  
786  
787  
788  
789  
790  
791  
792  
793  
794  
795  
796  
797  
798  
799

## 800 Figure Legends

801

### 802 **Figure 1: Annotation features of Bodo endosymbiont**

803 **A.** Graphical representation of *Candidatus* Bodocaedibacter vickermanii (Cbv) genome,  
804 generated using DNAPlotter v10.2 (86). Moving inwards, the tracks represent forward and  
805 reverse CDS, tRNAs, type VI secretion system (T6SS) encoding genes, hypothetical proteins  
806 (conserved in the *Candidatus* Paracaedibacteraceae bacterium UBA6184 genome and unique  
807 to Cbv), GC (%) plot and GC skew  $[(G-C)/(G+C)]$  plot. **B.** Percentage of conserved and  
808 unique hypothetical proteins encoded in genome and presence of secretion signal is shown in  
809 pie chart. **C.** Cluster of Orthologous Genes (COG) annotation categorization is shown in pie  
810 chart. Categories: Energy production and conversion (*C*), Cell cycle control, cell division,  
811 chromosome partitioning (*D*), Amino acid transport and metabolism (*E*), Nucleotide transport  
812 and metabolism (*F*), Carbohydrate transport and metabolism (*G*), Coenzyme transport and  
813 metabolism (*H*), Lipid transport and metabolism (*I*), Translation, ribosomal structure and  
814 biogenesis (*J*), Transcription (*K*), Replication, recombination and repair (*L*), Cell  
815 wall/membrane/envelope biogenesis (*M*), Cell Motility (*N*), Post-translational modification,  
816 protein turnover, chaperone functions (*O*), Inorganic ion transport and metabolism (*P*),  
817 Secondary metabolites biosynthesis, transport and catabolism (*Q*), Function Unknown (*S*),  
818 Signal transduction mechanisms (*T*), Intracellular trafficking, secretion, and vesicular  
819 transport (*U*), Defence mechanisms (*V*), Extracellular structures (*W*).

820

### 821 **Figure 2: Visualization of intracellular bacteria in *Bodo saltans***

822 Images from Fluorescent *in situ* hybridization (FISH) experiment (A-D) and transmission  
823 electron microscopy (TEM) experiment (E-G). Imaging of *B. saltans* cell cultures with  
824 differential interference contrast (A), staining with DAPI to visualize nucleus and kinteoplast

825 (B), FISH staining with endosymbiont specific probe conjugated to Cy3 (C) and images from  
826 three channels overlaid (D). Ultrastructure of the *B. saltans* cell (E) displaying nucleus (nuc),  
827 kinetoplast (kp), mitochondria (mt), food vacuole (fv), flagellar pocket (fp) and three  
828 intracellular bacteria marked with dark red arrows, endosymbionts showing the presence of  
829 an electron lucid halo around cell membrane (F-G). Images were acquired on a Zeiss Axio  
830 Observer Z1 (Carl Zeiss AG, Jena, Germany) equipped with 100x 1.4NA objective, 2.5x  
831 optovar. Images captured were analyzed using ImageJ v2.0 (87).

832

833 **Figure 3: 3D model of *Bodo saltans* cell generated using Serial Block Face-Scanning**

834 **Electron Microscopy.**

835 Animations of *B. saltans* cellular ultrastructure in longitudinal section. Two cells are shown  
836 with differences in endosymbiont number and distribution: cell 1 (A-E) and cell 2 (F-J). For  
837 each cell, one image with cell envelope (A, F) and four longitudinal sections with consecutive  
838 90-degree rotation around radial axis are shown (B-E and G-J). Cell envelope (in red) shows  
839 the bean shaped structure of *B. saltans* and two flagella emerging from flagellar pocket (in  
840 orange). Nucleus (in yellow) is situated in the centre of the cell and cytotobionts (in blue) are  
841 distributed in close vicinity to the nucleus. A large, swirled mitochondrion (in magenta) is  
842 placed around the periphery of the cell, with a kinetoplast capsule just under the flagellar  
843 pocket. Multiple food vacuoles (in green) are present at the posterior end of the cell.

844

845 **Figure 4: Phylogenetic relationships of *Candidatus Bodocaeidibacter vickermanii* and**

846 **other alpha-proteobacterial endosymbionts of protists.**

847 A maximum likelihood tree estimated from a concatenated alignment of 187 protein  
848 sequences. The tree is rooted with an outgroup (Mcm). Bootstrap values shown on the nodes  
849 are calculated from 1000 non-parametric replicates. The scale bar (0.3) is the number of

850 amino acid substitutions per site. Cartoons shown next to tree represent the isolation source  
851 (see Table 1 for details). Two columns on the right side depict the average amino acid  
852 identity (AAI) and number of orthologous gene clusters shared between *Ca. B. vickermanii*  
853 and each other genome sequence, with the corresponding value as a percentage of all genes  
854 shown in brackets.

855

856 **Figure 5: Polymorphic toxin systems in *Ca. B. vickermanii***

857 Schematic diagrams of the organization of the three predicted polymorphic toxin systems in  
858 *Ca. B. vickermanii*. In each case, the putative, alternative orphan toxin modules are shown  
859 downstream of the main multi-domain toxin. Beneath each is a protein multiple sequence  
860 alignment of the main toxin C-terminus and the alternative orphan sequences, generated  
861 using MAFFT program under default parameters as implemented in Geneious software v6.7.  
862 Gray scale gradient represents identical (black), similar (dark gray) and dissimilar (light gray)  
863 residues in the alignment based on the Blosum62 score matrix. Note that the specification of  
864 orphan modules is least certain for PTS III. Although CPBP\_00970 resembles the N-terminus  
865 of CPBP\_00960, its coding sequence is abbreviated. This, and the metalloprotease (PF03410)  
866 match of CPBP\_00971 that would, by expected PTS gene positioning encode an antitoxin,  
867 argue against this pair of genes representing an orphan module. Another pair of genes that  
868 should, by the PTS gene positioning scheme, be an orphan module are CPBP\_00964 and  
869 CPBP\_00965. However, these two sequences are short (75 and 67 residues respectively),  
870 homologous (around 34% identical) and CPBP\_00964 lacks any homology to the N-terminus  
871 of CPBP\_00960, arguing against these genes constituting an orphan module.

872

873 **Figure 6: Rifampicin treatment of kinetoplastids with and without endosymbionts**

874 Three kinetoplastids were treated with rifampicin and observed for their behavior on  
875 treatment. *B. saltans* possesses an endosymbiont, *T. theileri* and *L. costaricensis* are parasitic  
876 species that do not. The graph shows number of cells before treatment and after 24 hours of  
877 treatment. The bars are average of three independent experiments. Statistical significance was  
878 calculated using ratio paired T-test.  
879

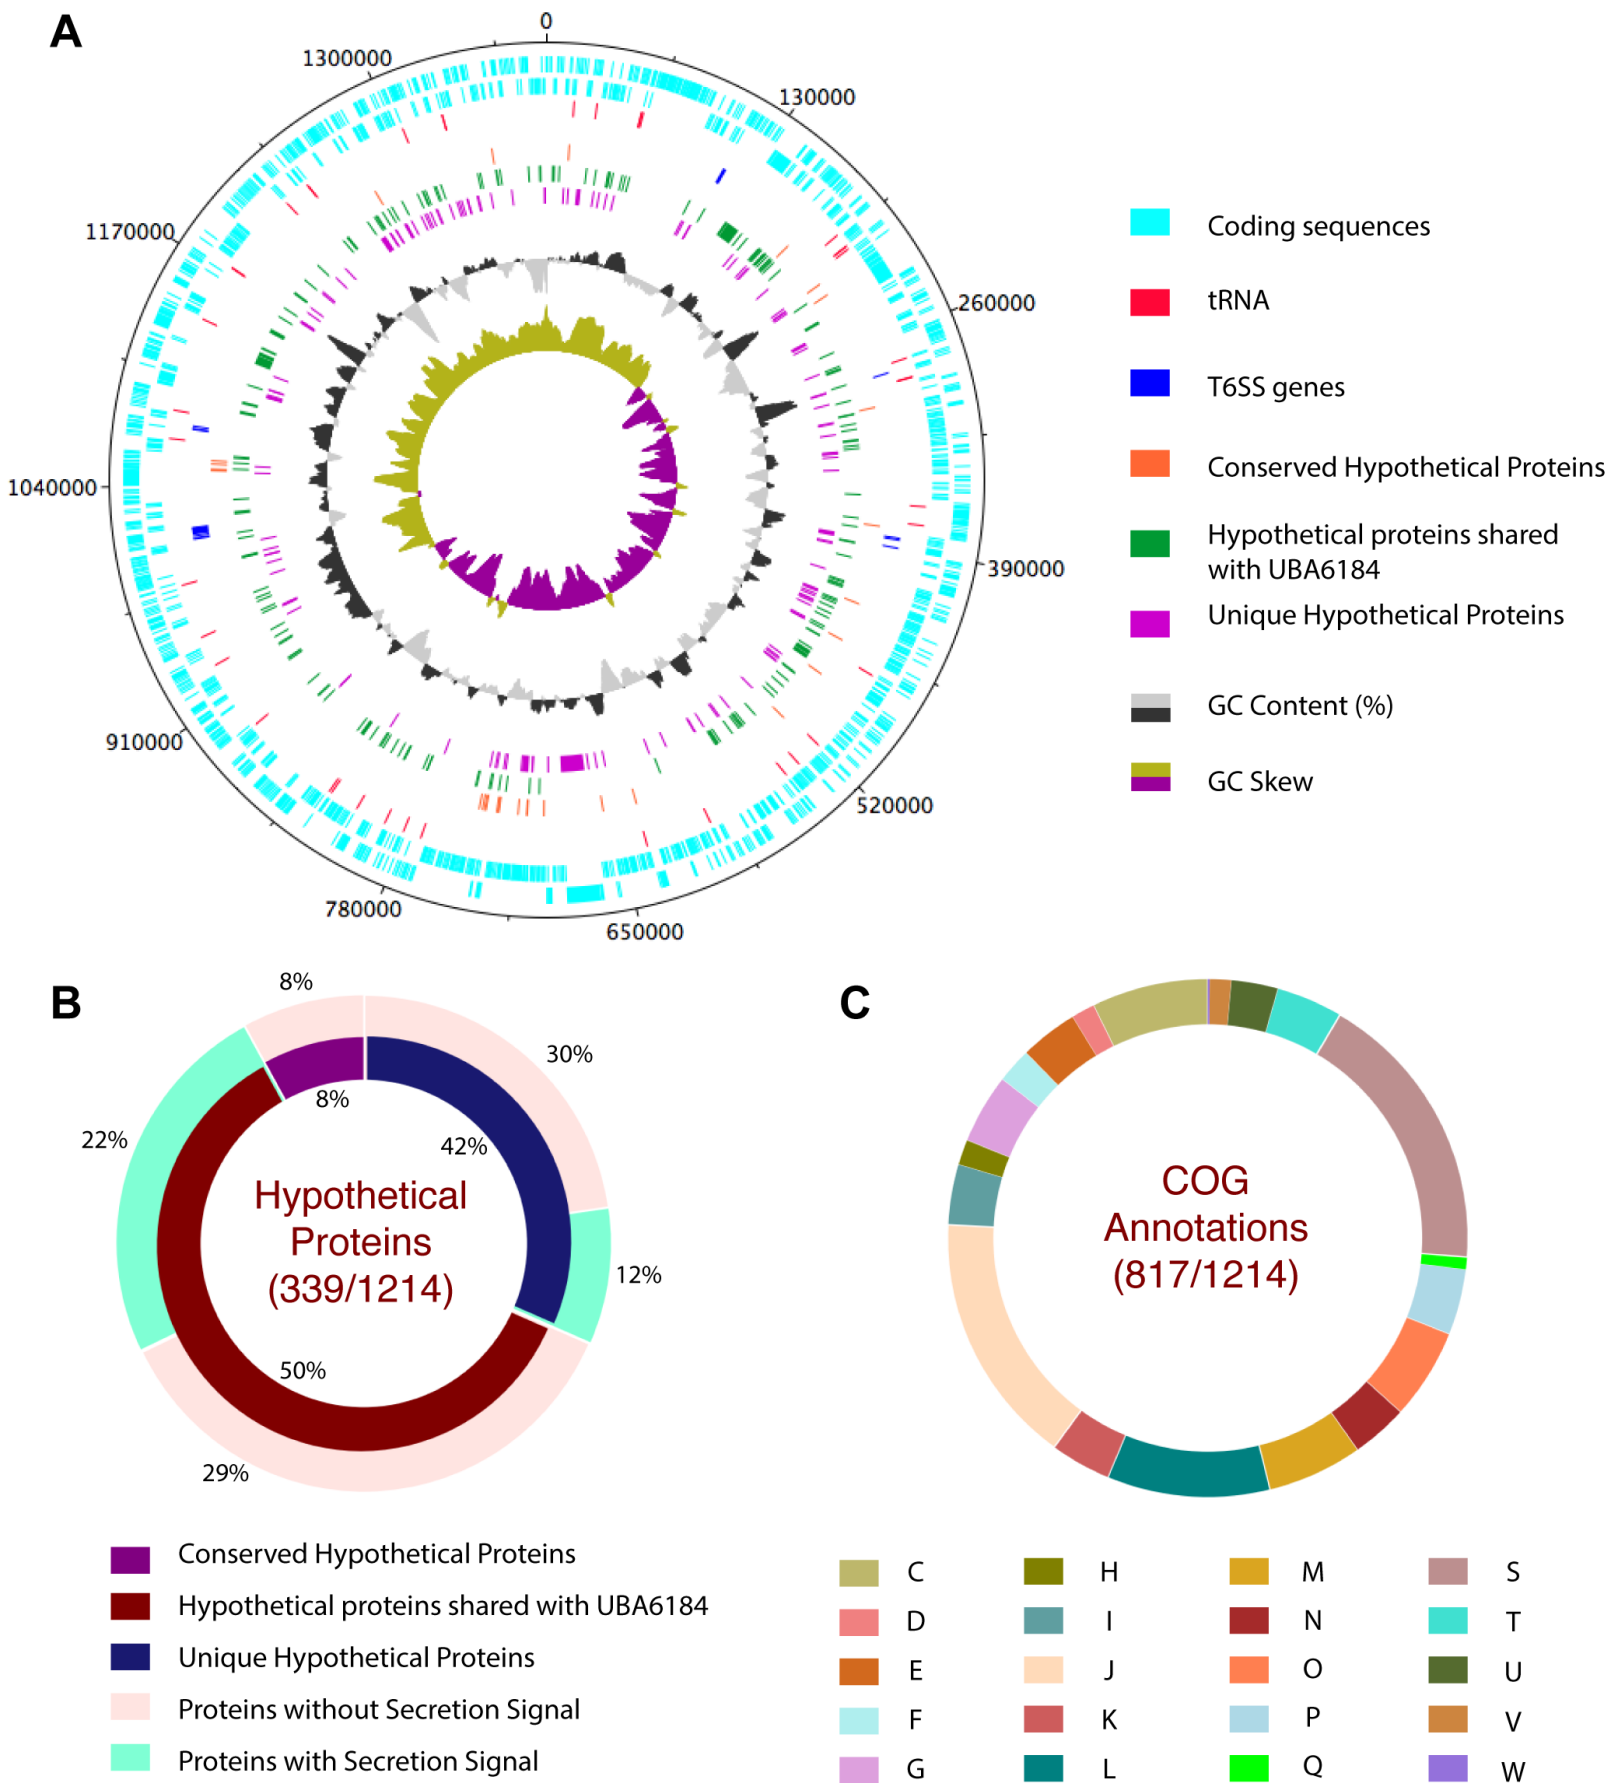

Figure 1

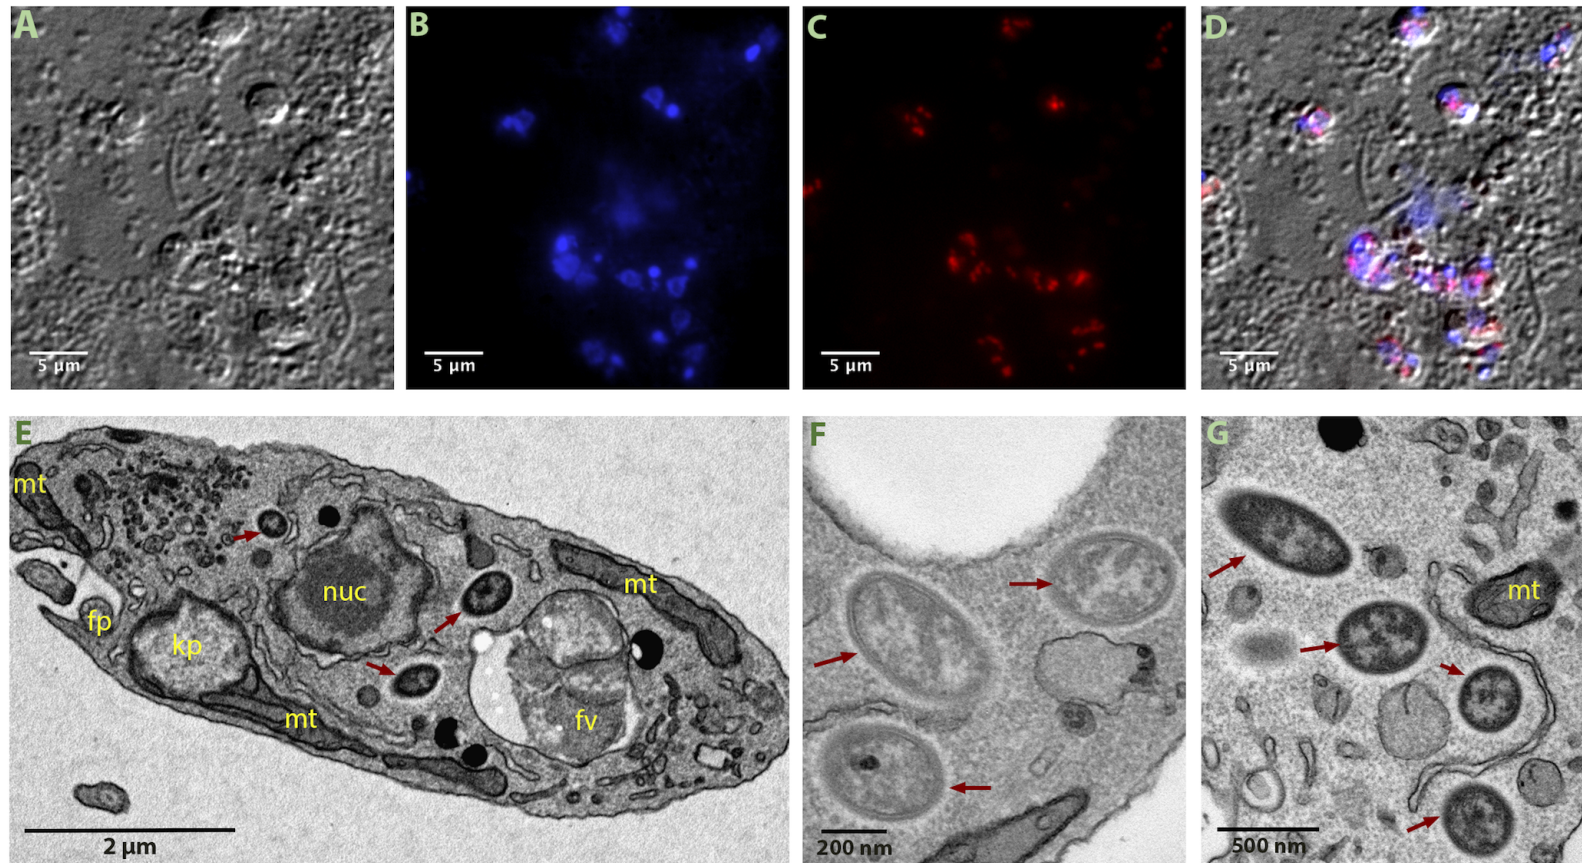

Figure 2

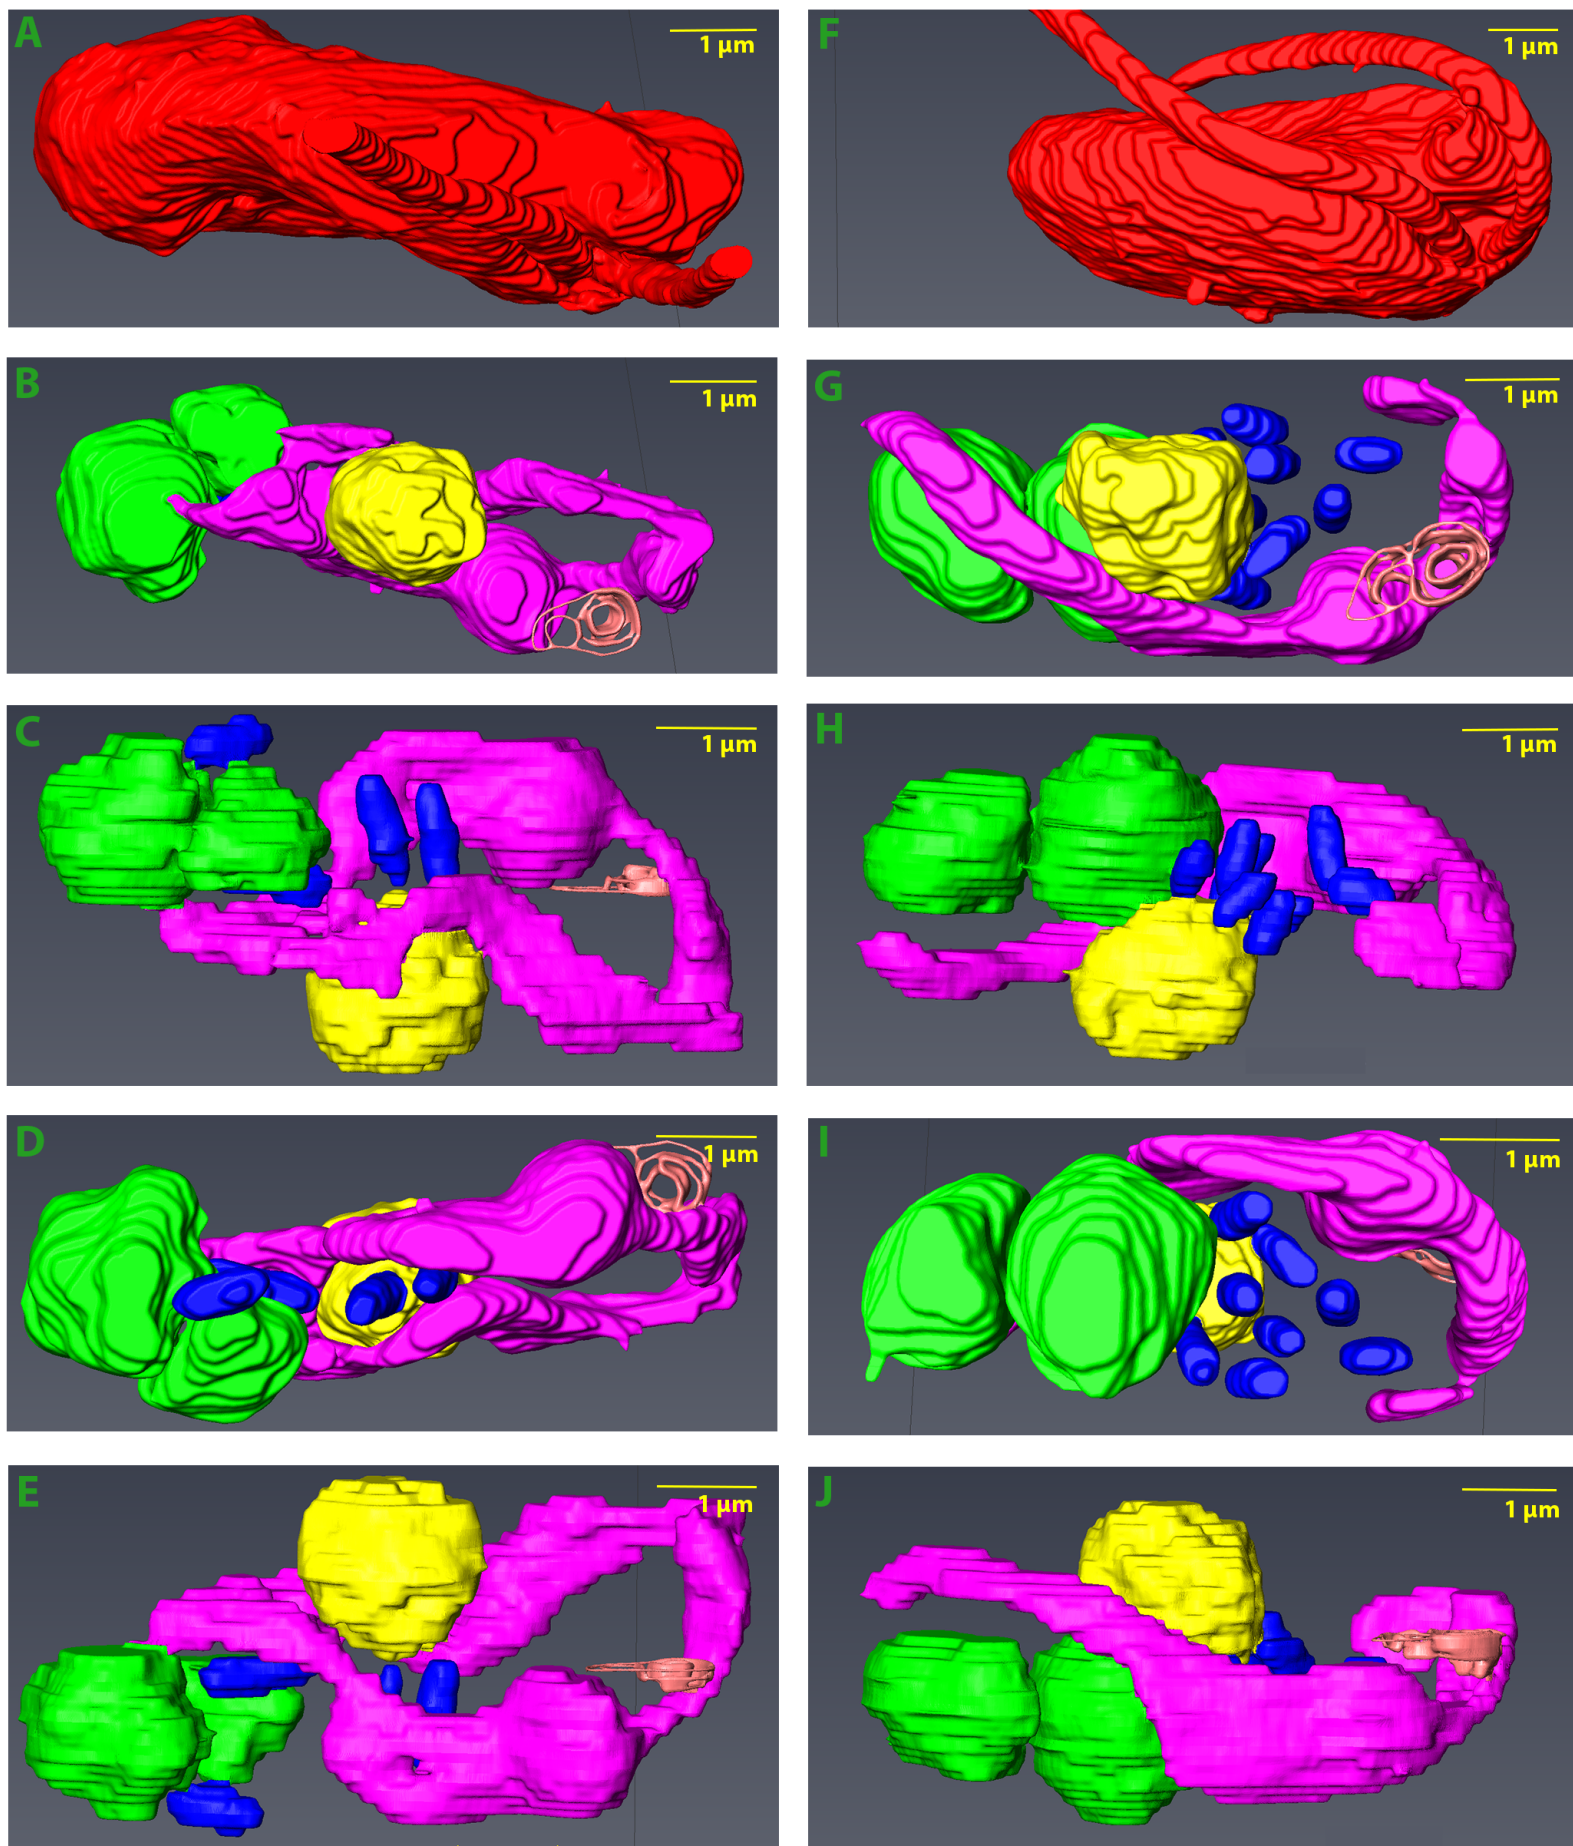

Figure 3



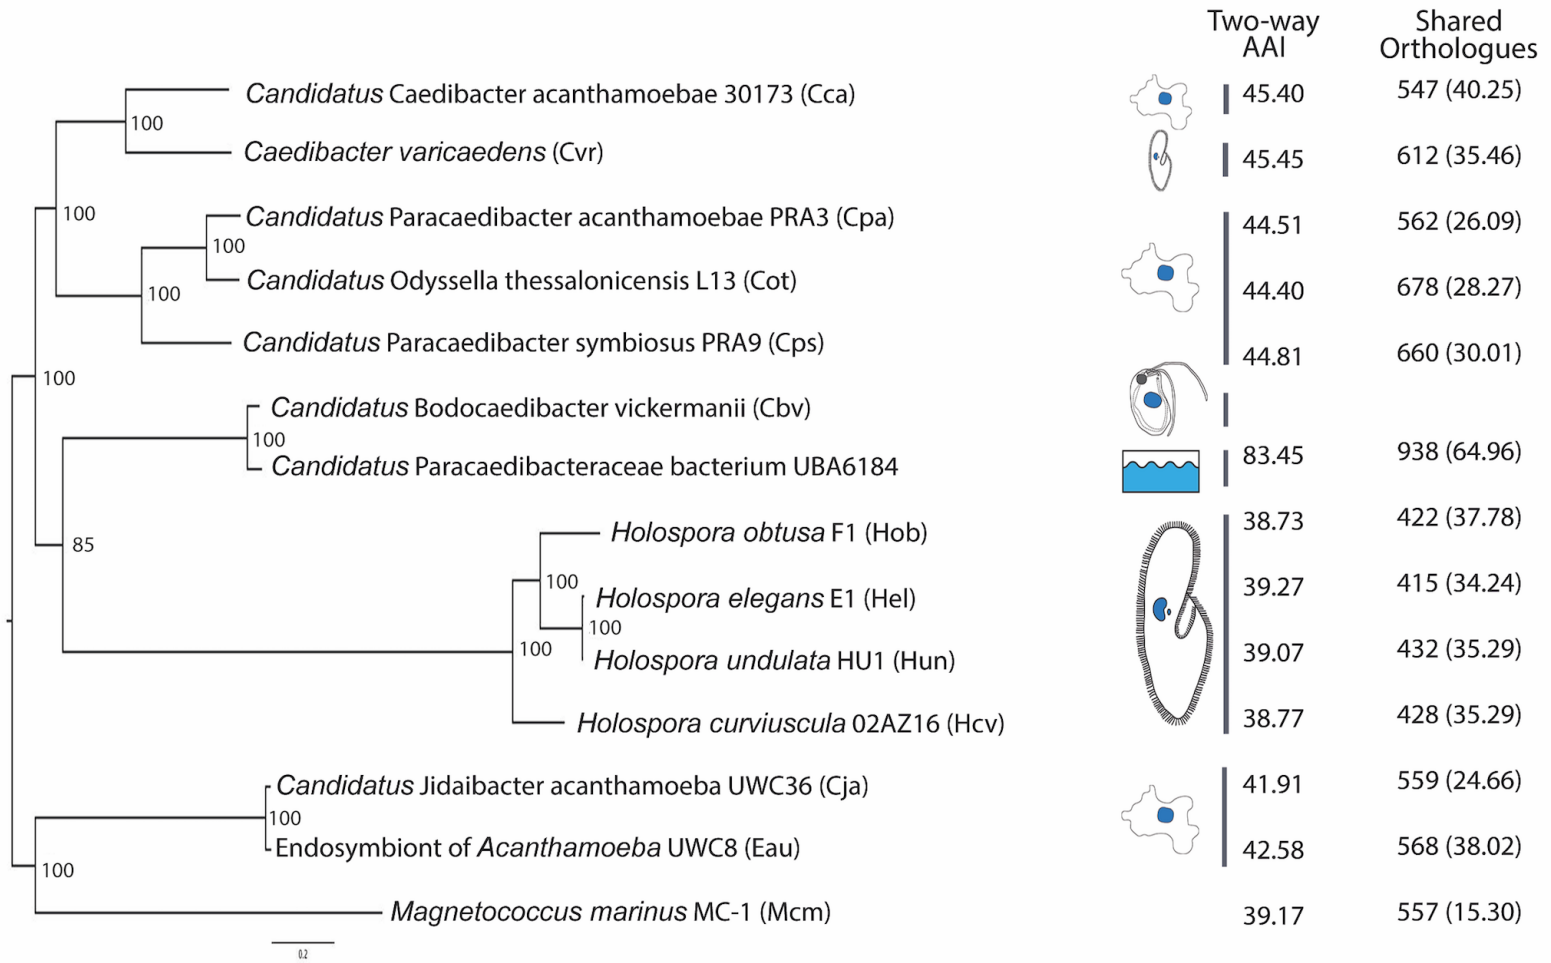

Figure 4

## A) Polymorphic Toxin System I

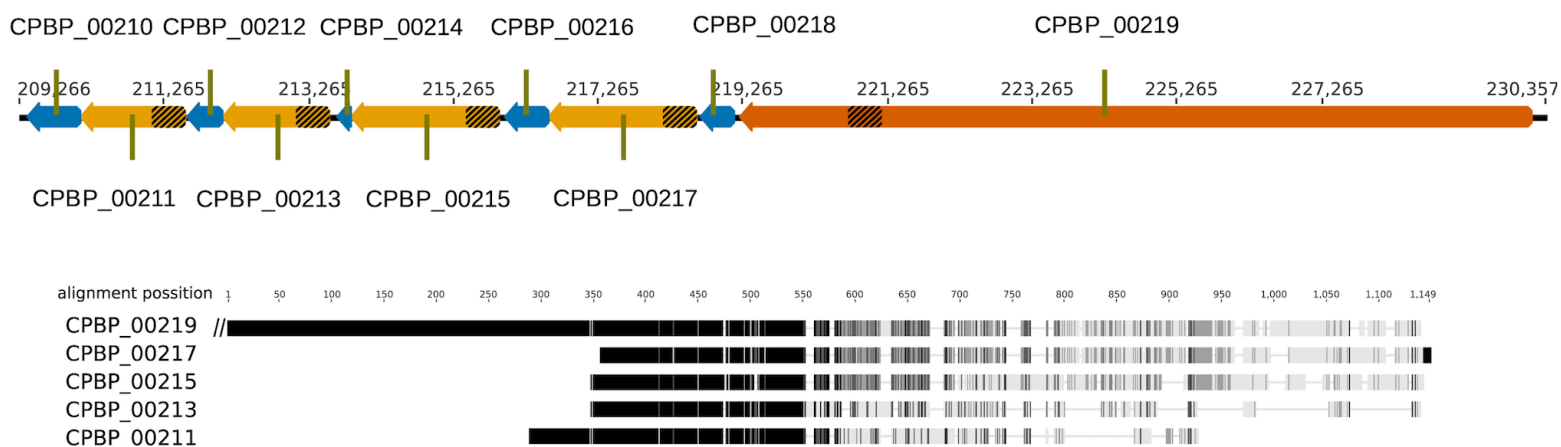

## B) Polymorphic Toxin System II

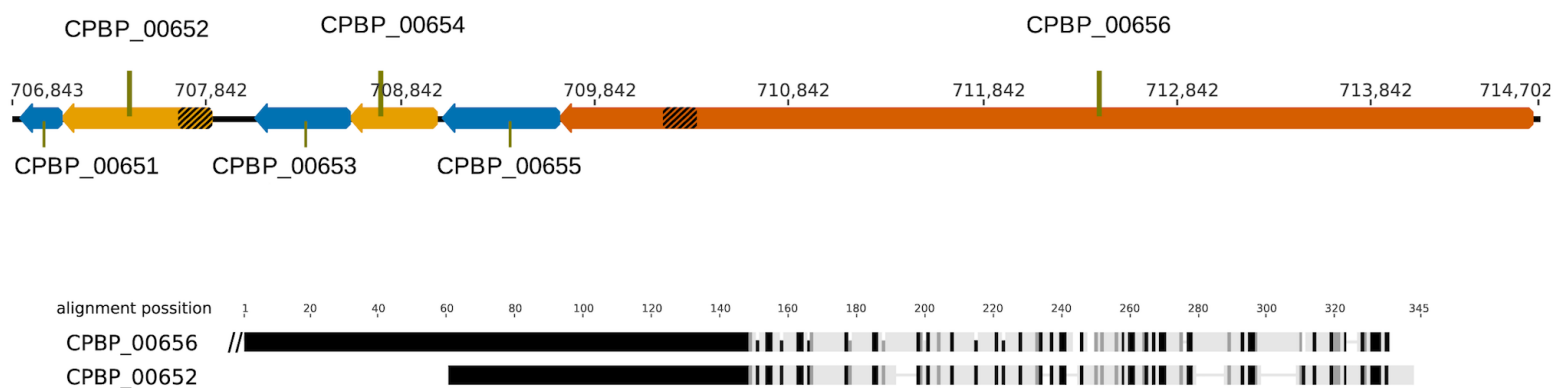

## C) Polymorphic Toxin System III

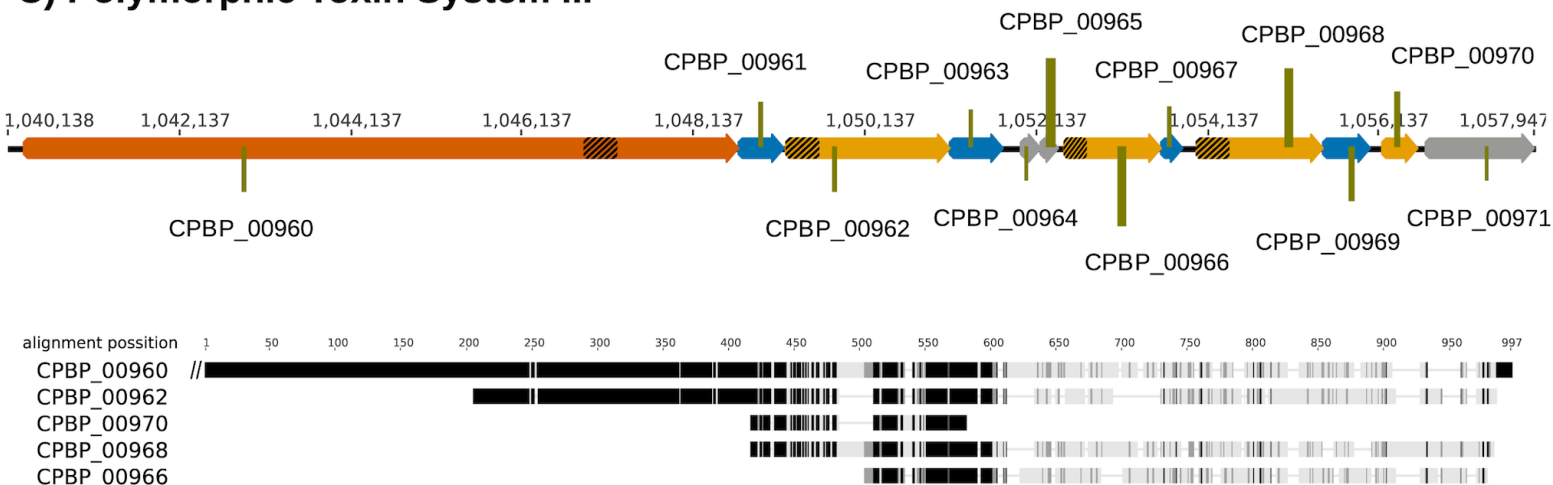

- █ Complete multidomain toxins
- █ Alternative orphan toxin modules
- █ Anti-toxins
- █ Other
- ▨ Regions of homology

Figure 5

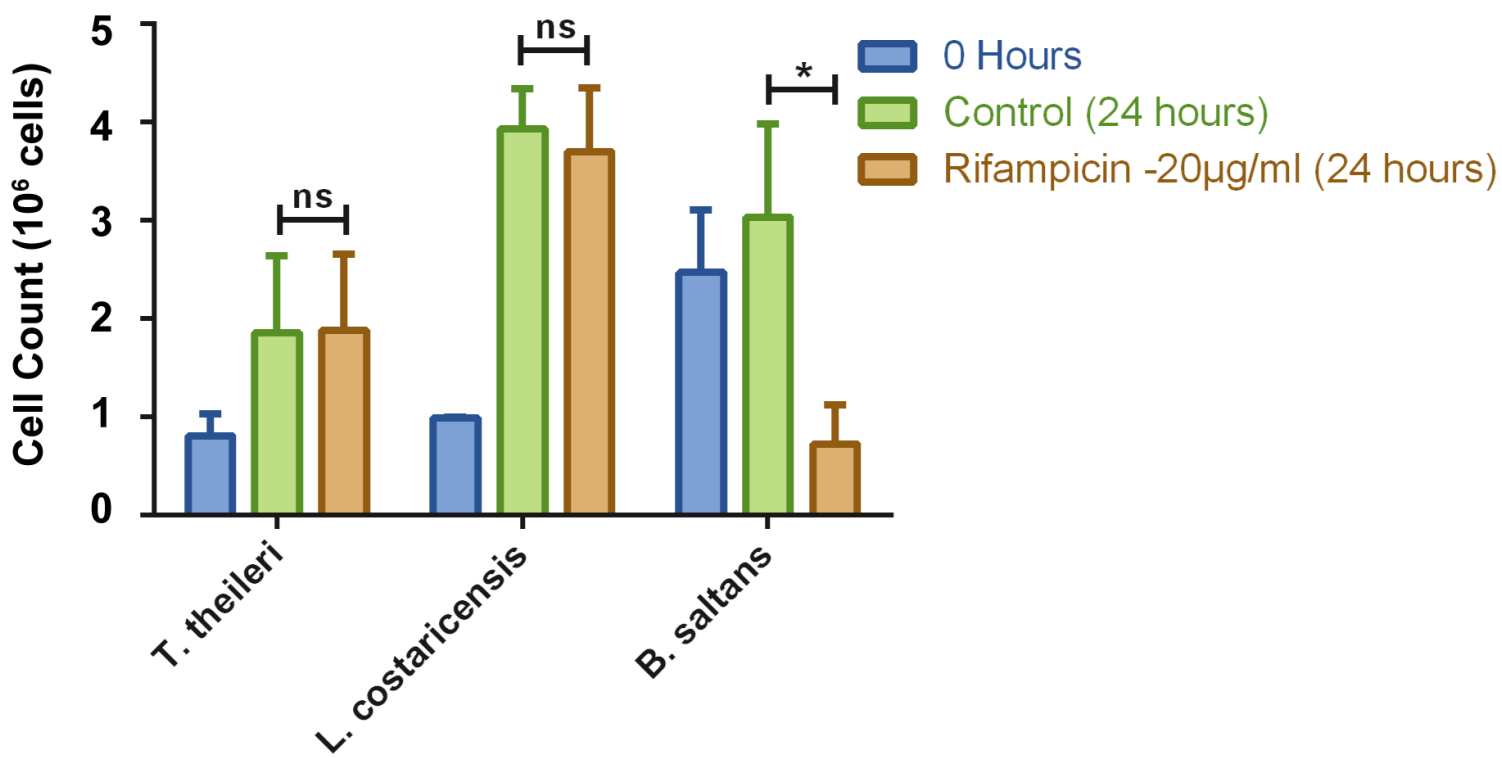

Figure 6

**Table 1: List of genomes used in the study: Annotation features, isolation source and accession numbers**

| S.No. | Organism                                                 | GC content (%) | Size (Mb) | CDS  | tRNA | rRNA | Family               | Order        | Phylum         | Host/Isolation source              | Accession number      |
|-------|----------------------------------------------------------|----------------|-----------|------|------|------|----------------------|--------------|----------------|------------------------------------|-----------------------|
| 1     | <i>Candidatus</i> Caedibacter acanthamoebae 30173        | 38.2           | 1.72      | 1359 | 42   | 3    | Caedimonadaceae      | Holosporales | Proteobacteria | <i>Acanthamoeba polyphaga</i> HN-3 | CP008936              |
| 2     | <i>Caedibacter varicaedens</i>                           | 42.1           | 1.69      | 1726 | 41   | 3    | Caedimonadaceae      | Holosporales | Proteobacteria | <i>Paramecium biaurelia</i>        | BBVC00000000          |
| 3     | <i>Candidatus</i> Paracaedibacter symbiosus PRA9         | 41.5           | 2.66      | 2199 | 43   | 6    | Paracaedibacteraceae | Holosporales | Proteobacteria | <i>Acanthamoeba</i> sp. UWET39     | JQAK00000000          |
| 4     | <i>Candidatus</i> Odysseella thessalonicensis L13        | 42             | 2.85      | 2398 | 40   | 3    | Paracaedibacteraceae | Holosporales | Proteobacteria | <i>Acanthamoeba</i>                | AEWF00000000          |
| 5     | <i>Candidatus</i> Paracaedibacter acanthamoebae PRA3     | 41.0           | 2.47      | 2154 | 43   | 6    | Paracaedibacteraceae | Holosporales | Proteobacteria | <i>Acanthamoeba</i>                | CP008941              |
| 6     | <i>Candidatus</i> Bodocaedibacter vickermanii            | 40.7           | 1.39      | 1214 | 40   | 6    | Paracaedibacteraceae | Holosporales | Proteobacteria | <i>Bodo saltans</i>                | CP054719 (this study) |
| 7     | <i>Candidatus</i> Paracaedibacteraceae bacterium UBA6184 | 40.1           | 1.47      | 1444 | 30   | -    | Paracaedibacteraceae | Holosporales | Proteobacteria | waste water                        | DITM00000000          |
| 8     | <i>Holospora curviuscula</i> 02AZ16                      | 38.1           | 1.72      | 1534 | 42   | 3    | Holosporaceae        | Holosporales | Proteobacteria | <i>Paramecium bursaria</i>         | PHHC00000000          |
| 9     | <i>Holospora obtusa</i> F1                               | 35.2           | 1.33      | 1249 | 36   | 3    | Holosporaceae        | Holosporales | Proteobacteria | <i>Paramecium caudatum</i>         | AWTR000000000         |
| 10    | <i>Holospora undulata</i> HU1                            | 36.1           | 1.40      | 1460 | 44   | 3    | Holosporaceae        | Holosporales | Proteobacteria | <i>Paramecium caudatum</i>         | ARPM00000000          |
| 11    | <i>Holospora elegans</i> E1                              | 36.0           | 1.27      | 1454 | 37   | 3    | Holosporaceae        | Holosporales | Proteobacteria | <i>Paramecium caudatum</i>         | BAUP00000000          |

|    |                                                     |      |      |      |    |   |                               |                     |                |                                         |              |
|----|-----------------------------------------------------|------|------|------|----|---|-------------------------------|---------------------|----------------|-----------------------------------------|--------------|
| 12 | Endosymbiont of<br><i>Acanthamoeba</i> UWC8         | 34.8 | 1.62 | 1494 | 36 | 3 | Candidatus<br>Midichloriaceae | Rickettsiales       | Proteobacteria | <i>Acanthamoeba</i>                     | CP004403     |
| 13 | <i>Candidatus</i> Jidaibacter<br>acanthamoeba UWC36 | 33.7 | 2.37 | 2267 | 36 | 3 | Candidatus<br>Midichloriaceae | Rickettsiales       | Proteobacteria | <i>Acanthamoeba</i><br><i>sp.</i> UWC36 | JSWE00000000 |
| 14 | <i>Magnetococcus marinus</i><br>MC-1                | 54.2 | 4.72 | 3766 | 45 | 9 | Magnetococcaceae              | Magnetococcal<br>es | Proteobacteria | marine water                            | CP000471     |

**Table 2: Annotation of polymorphic toxin systems by distant homology detection with HHsearch**

| Gene                              | Module position          | Description based on position and/or matching families | Matching Pfam or PDB entry suggestive of toxin or antitoxin function       | Matching probability (%), sequence identity of HHsearch alignment |
|-----------------------------------|--------------------------|--------------------------------------------------------|----------------------------------------------------------------------------|-------------------------------------------------------------------|
| <i>Polymorphic Toxin System I</i> |                          |                                                        |                                                                            |                                                                   |
| CPBP_00219                        |                          | Complete multidomain toxin                             | AHH nuclease domain (PF14412)                                              | 93, 23                                                            |
| CPBP_00218                        |                          | Antitoxin                                              | Gmx_para_CXXCG (PF09535); DUF1629 (PF07791); Immunity protein 43 (PF15570) | 100, 14;<br>99, 15;<br>96, 16                                     |
| CPBP_00217                        | Orphan module 1          | Alternate toxin domain                                 | Tox-HNH-HHH nuclease domain (PF15637)                                      | 100, 34                                                           |
| CPBP_00216                        |                          | Antitoxin                                              | SUKH superfamily 5 (PF14567)                                               | 88, 15                                                            |
| CPBP_00215                        | Orphan module 2          | Alternate toxin domain                                 | Cloacin; Colicin-like bacteriocin tRNase domain (PF03515)                  | 99, 6                                                             |
| CPBP_00214                        |                          | Antitoxin                                              | Colicin/pyocin immunity protein (PF01320)                                  | 100,16                                                            |
| CPBP_00213                        | Probable orphan module 3 | Alternate toxin domain                                 | <i>No strong match to any family or structure</i>                          |                                                                   |
| CPBP_00212                        |                          | Antitoxin                                              | <i>No strong match to any family or structure</i>                          |                                                                   |
| CPBP_00211                        | Orphan module 4          | Alternate toxin domain                                 | DUF1837 (PF08878)                                                          | 81, 16                                                            |
| CPBP_00210                        |                          | Antitoxin                                              | Immunity protein 49 (PF15575)                                              | 100,12                                                            |

| <b><i>Polymorphic Toxin System II</i></b>  |                          |                                     |                                                                               |         |
|--------------------------------------------|--------------------------|-------------------------------------|-------------------------------------------------------------------------------|---------|
| CPBP_00656                                 |                          | Complete multidomain toxin          | Tox-HNH-HHH nuclease domain (PF15637)                                         | 99, 40  |
| CPBP_00655                                 |                          | Antitoxin                           | SUKH superfamily 5 (PF14567)                                                  | 91, 15  |
| CPBP_00654                                 | Orphan module 1          | Alternate toxin domain              | DNase/tRNase domain of colicin-like bacteriocin (PF12639)                     | 100, 28 |
| CPBP_00653                                 |                          | Antitoxin                           | SUKH superfamily 5 (PF14567)                                                  | 100, 12 |
| CPBP_00652                                 | Orphan module 2          | Alternate toxin domain              | S-type pyocin (PF06958)                                                       | 99, 9   |
| CPBP_00651                                 |                          | Antitoxin                           | Colicin/pyocin immunity protein (PF01320)                                     | 100,13  |
| <b><i>Polymorphic Toxin System III</i></b> |                          |                                     |                                                                               |         |
| CPBP_00960                                 |                          | Presumed complete multidomain toxin | <i>No strong match to any family or structure</i>                             |         |
| CPBP_00961                                 |                          | Presumed antitoxin                  | <i>No strong match to any family or structure</i>                             |         |
| CPBP_00962                                 | Possible Orphan module 1 | Alternate toxin domain              | <i>No strong match to any family or structure</i>                             |         |
| CPBP_00963                                 |                          | Antitoxin                           | DUF3885 (PF13021)                                                             | 100, 32 |
| CPBP_00964                                 | Not an orphan module     | -                                   | <i>Short, uninformative matches against a variety of Pfam and PDB entries</i> |         |
| CPBP_00965                                 |                          | -                                   | <i>Short, uninformative matches against a variety of Pfam and PDB entries</i> |         |
| CPBP_00966                                 | Possible Orphan module 2 | Alternate toxin domain              | Metallopeptidase toxin 5 (PF15641)                                            | 98, 12  |
| CPBP_00967                                 |                          | Antitoxin                           | Colicin-like immunity protein (PF09204)                                       | 92,13   |
| CPBP_00968                                 | Possible Orphan module 3 | Alternate toxin domain              | <i>No strong match to any family or structure</i>                             |         |
| CPBP_00969                                 |                          | Antitoxin                           | <i>No strong match to any family or structure</i>                             |         |

|            |                          |                        |                                                   |  |
|------------|--------------------------|------------------------|---------------------------------------------------|--|
| CPBP_00970 | Unlikely Orphan module 4 | Alternate toxin domain | <i>No strong match to any family or structure</i> |  |
| CPBP_00971 |                          | Antitoxin              | Metalloprotease (PF03410)                         |  |
